# Supplementary material for: The importance of blood-borne viruses in elevated cancer risk among opioid-dependent people: a population-based cohort study
Source: PubMed Central journal article supplement — BMJ Open. 2012 Oct 8;2(5):e001755. doi: 10.1136/bmjopen-2012-001755 (PMC3488729; doi:10.1136/bmjopen-2012-001755), 2012-10-08
Supplement: bmjopen-2012-001755.draft_revisions.pdf [file bmjopen-2012-001755.draft_revisions.pdf]

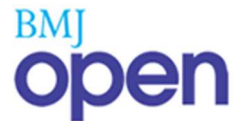

**The importance of blood borne viruses in elevated cancer risk among opioid dependent people: a population-based cohort study**

|                                 |                                                                                                                                                                                                                                                                                                                                                                                                                                                                                                                                                                                                                                                                                                                                                                                       |
|---------------------------------|---------------------------------------------------------------------------------------------------------------------------------------------------------------------------------------------------------------------------------------------------------------------------------------------------------------------------------------------------------------------------------------------------------------------------------------------------------------------------------------------------------------------------------------------------------------------------------------------------------------------------------------------------------------------------------------------------------------------------------------------------------------------------------------|
| Journal:                        | <i>BMJ Open</i>                                                                                                                                                                                                                                                                                                                                                                                                                                                                                                                                                                                                                                                                                                                                                                       |
| Manuscript ID:                  | bmjopen-2012-001755                                                                                                                                                                                                                                                                                                                                                                                                                                                                                                                                                                                                                                                                                                                                                                   |
| Article Type:                   | Research                                                                                                                                                                                                                                                                                                                                                                                                                                                                                                                                                                                                                                                                                                                                                                              |
| Date Submitted by the Author:   | 02-Jul-2012                                                                                                                                                                                                                                                                                                                                                                                                                                                                                                                                                                                                                                                                                                                                                                           |
| Complete List of Authors:       | Swart, Alexander; University of New South Wales, Prince of Wales Clinical School<br>Burns, Lucinda; University of New South Wales, National Drug and Alcohol Research Centre<br>Mao, Limin; University of New South Wales, National Centre in HIV Social Research<br>Grulich, Andrew; National Centre in HIV Epidemiology<br>Amin, Janaki; University of New South Wales, Kirby Institute<br>O'Connell, Dianne; The Cancer Council NSW, Cancer Epidemiology Research Unit<br>Meagher, Nicola; University of New South Wales, Prince of Wales Clinical School<br>Randall, Deborah; University of Western Sydney,<br>Degenhardt, Louisa; University of NSW, National Drug and Alcohol Research Centre<br>Vajdic, Claire; University of New South Wales, Prince of Wales Clinical School |
| <b>Primary Subject Heading</b>: | Public health                                                                                                                                                                                                                                                                                                                                                                                                                                                                                                                                                                                                                                                                                                                                                                         |
| Secondary Subject Heading:      | Oncology, Addiction, Epidemiology, Infectious diseases                                                                                                                                                                                                                                                                                                                                                                                                                                                                                                                                                                                                                                                                                                                                |
| Keywords:                       | Public health < INFECTIOUS DISEASES, Epidemiology < ONCOLOGY, PUBLIC HEALTH                                                                                                                                                                                                                                                                                                                                                                                                                                                                                                                                                                                                                                                                                                           |
|                                 |                                                                                                                                                                                                                                                                                                                                                                                                                                                                                                                                                                                                                                                                                                                                                                                       |

SCHOLARONE™  
Manuscripts

1  
2  
3 **The importance of blood-borne viruses in elevated cancer risk among opioid dependent**  
4 **people: a population-based cohort study**  
5  
6  
7  
8

9 Alexander Swart<sup>1</sup>, Lucinda Burns<sup>2</sup>, Limin Mao<sup>3</sup>, Andrew E. Grulich<sup>4</sup>, Janaki Amin<sup>4</sup>, Dianne  
10 L. O'Connell<sup>5,6,7,8</sup>, Nicola S. Meagher<sup>1</sup>, Deborah A. Randall<sup>9</sup>, Louisa Degenhardt<sup>2,10</sup>, Claire  
11 M. Vajdic<sup>1</sup>  
12  
13  
14  
15

16  
17  
18 1 Adult Cancer Program, Lowy Cancer Research Centre, Prince of Wales Clinical School,  
19 Faculty of Medicine at the University of New South Wales, NSW 2052, Australia.  
20

21  
22 2 National Drug and Alcohol Research Centre, Faculty of Medicine at the University of New  
23 South Wales, NSW 2052, Australia  
24  
25

26  
27 3 National Centre in HIV Social Research, Faculty of Arts and Social Sciences at the  
28 University of New South Wales, NSW 2052, Australia  
29

30  
31 4 Kirby Institute, Faculty of Medicine at the University of New South Wales, NSW 2052,  
32 Australia  
33  
34

35  
36 5 Cancer Research Division, Cancer Council NSW, NSW 2011, Australia  
37

38 6 School of Medicine and Public Health, Faculty of Health, University of Newcastle  
39

40 7 School of Public Health and Community Medicine, University of New South Wales, NSW  
41 2052, Australia  
42  
43

44  
45 8 Sydney Medical School – Public Health, University of Sydney, NSW 2006, Australia  
46

47 9 School of Medicine, University of Western Sydney, NSW 2751, Australia  
48

49 10 Centre for Health Policy, Programs and Economics, School of Population Health,  
50 University of Melbourne, Victoria 3010, Australia  
51  
52  
53  
54  
55  
56  
57  
58  
59  
60

**Corresponding author**

Claire M. Vajdic, Adult Cancer Program, Lowy Cancer Research Centre, University of New South Wales, NSW 2052, Australia. Phone (61-2) 9385 1424; fax (61-2) 9385 1430; email: claire.vajdic@unsw.edu.au

**Key words**

Cancer risk, opioid dependence, pharmacotherapy, opioid substitution therapy, blood-borne viruses.

Word count (abstract): 291

Word count (text): 3220

Number of tables: 4

Number of figures: 3

Number of references: 34

## ARTICLE SUMMARY

### Article focus

- Opioid dependence is associated with exposure to a number of carcinogens, including the blood-borne viruses hepatitis B, hepatitis C and HIV.
- The risk of cancer in opioid dependence has been examined in two studies with insufficient power to address risk for all cancer types.
- There is no prior evidence on the association between blood-borne virus infection and cancer risk in people who are opioid dependent.

### Key messages

- People who are opioid dependent have an excess risk of a range of cancers compared with the general population.
- The excess cancer risk is predominantly restricted to those with blood-borne virus infection.
- Cancer incidence rates have increased dramatically over time, supporting use of the opioid substitution therapy setting to implement targeted cancer prevention strategies.

### Strengths and limitations

- The study is based on a large population-based cohort with infections and outcomes obtained from registries.
- Misclassification of infection by blood-borne viruses is possible because not all OST recipients will have been routinely tested.
- Data on blood-borne virus treatment and vaccination are not available.

## ABSTRACT

**Objective** To quantify cancer risk in opioid dependence and the association with infection by the oncogenic blood-borne viruses (BBVs) hepatitis C (HCV), hepatitis B (HBV), and HIV infection.

**Design** Cohort study.

**Setting** New South Wales, Australia.

**Participants** 45 412 adults aged 16 years or over registered for opioid substitution therapy (OST) between 1985 and 2007. Notifications of cancer, death, and infection with HCV, HBV, and HIV were ascertained by record linkage with registries.

**Main outcome measures** The ratios of observed to expected number of cancers, standardised incidence ratios (SIRs), and the average annual percent change (AAPC) in overall age and sex-standardised cancer incidence.

**Results** Overall cancer risk was modestly increased compared to the general population (SIR 1.15, 95% CI 1.07 to 1.23). Excess risk was observed for 11 cancers, particularly lung (4.02, 95% CI 3.32 to 4.82), non-Hodgkin lymphoma (1.51, 95% CI 1.20 to 1.88), and liver (8.04, 95% CI 6.18 to 10.3). Reduced risk was observed for six cancers, including prostate (0.16, 95% CI 0.06 to 0.32) and breast (0.48, 95% CI 0.35 to 0.62). Individuals notified with HCV or HBV had a markedly increased risk of liver cancer; lung cancer risk was also increased in those with HCV. HIV was associated with an elevated risk of liver, anus, and kidney cancer, non-Hodgkin lymphoma and Kaposi sarcoma. Cancer risk was not increased in individuals without a BBV notification, apart from pancreatic cancer (3.92, 95% CI 1.07 to 10.0). Cancer incidence increased significantly over time (AAPC 9.4%, 4.2 to 15%,  $p=0.001$ ).

**Conclusions** BBVs play a major role in the cancer risk profile of opioid-dependent individuals registered for OST. To address the dramatic increasing trend in cancer incidence,

1  
2  
3  
4  
5  
6  
7  
8  
9  
10  
11  
12  
13  
14  
15  
16  
17  
18  
19  
20  
21  
22  
23  
24  
25  
26  
27  
28  
29  
30  
31  
32  
33  
34  
35  
36  
37  
38  
39  
40  
41  
42  
43  
44  
45  
46  
47  
48  
49  
50  
51  
52  
53  
54  
55  
56  
57  
58  
59  
60

the OST setting should be utilised for targeted strategies including BBV prevention and treatment.

For peer review only

## INTRODUCTION

Opioid-dependent individuals are exposed to a multitude of carcinogens. People who inject drugs are more likely to have hepatitis C (HCV), hepatitis B (HBV) or human immunodeficiency virus (HIV).<sup>1</sup> Tobacco-smoking and hazardous alcohol use are extremely common,<sup>2</sup> as are risky sexual practices, resulting in high rates of infection with human papillomavirus (HPV).<sup>3</sup> Although it is an effective treatment for heroin and other opioid dependence,<sup>4</sup> opioid substitution therapy (OST) use is typically cyclic,<sup>5</sup> with relapse to drug injection a common occurrence.

In Australia, the long-standing and widespread availability of OST and public health initiatives such as needle and syringe programmes (NSPs) have extended the life expectancy of opioid-dependent people.<sup>4,6</sup> In injecting drug users, the prevalence of HIV is low (<1% in heterosexuals), whereas the prevalence of hepatitis C is high (50-60%),<sup>7</sup> and one of the consequences of this success is the attendant risk of age-related health conditions, including cancer.<sup>8</sup> The OST agents themselves are not considered risk factors for cancer as murine studies indicate they are not carcinogenic.<sup>9,10</sup>

Despite evidence of exposure to multiple cancer risk factors and the public health impact that this may have upon ageing cohorts of opioid-dependent people, there has been no population-based study of the spectrum of cancer risk in this group and no study of this risk in relation to blood-borne virus (BBV) infection. We examined these associations among 45412 people who entered OST in New South Wales (NSW), Australia over a 23-year period, considering 1) overall and site-specific cancer incidence, 2) the cancer risk profiles of those infected with HCV, HBV, and HIV, and 3) trends in cancer incidence over time.

## METHODS

### Study population

We conducted a cohort study using record linkage between existing population-based health datasets. The study population comprised individuals registered on the Pharmaceutical Drugs of Addiction System, a record of all NSW Health Department authorities that administer methadone or buprenorphine to opioid-dependent people. Included were all adults ( $\geq 16$  years) registered for OST between 1st January 1985, the date of inception of the system, and 31st December 2007, the latest date for which cancer diagnoses were available ( $n=45\,483$ ). Individuals were excluded from the cohort if information essential for record linkage was incomplete ( $n=10$ , 0.02%) or if the OST end date preceded the start date ( $n=61$ , 0.13%). Registrants diagnosed with cancer prior to commencing OST ( $n=183$ , 0.40%) were not excluded; however they did not contribute time at risk for that cancer.

HBV and HCV notification data were available for NSW residents only from 1993. Therefore our analyses of cancer risk in those with hepatitis notifications and those with no BBVs (no HCV, HBV, or HIV notification) were restricted to a sub-cohort of individuals registered for OST from 1st January 1993 ( $n=32\,075$ ). To limit the potential for under-ascertainment of hepatitis notifications, interstate OST registrants ( $n=2\,462$ , 7.68%) were excluded and other OST registrants were censored when they moved interstate OST ( $n=2\,297$ , 7.76%).

### Data collection

In Australia, all deaths, newly diagnosed cancers (excluding basal and squamous cell carcinoma of the skin), and HCV, HBV, and HIV infections must be reported to government agencies by statute. Dates of death in OST registrants were ascertained by linkage with the National Death Index (1980–2007). The date of diagnosis, topography and morphology of



1  
2  
3 incident cancers were identified by linkage with the Australian Cancer Database, a register of  
4  
5 incident primary invasive neoplasms (1982–2007). Solid cancers were classified according to  
6  
7 the International Classification of Diseases (ICD), 10th revision while haematopoietic  
8  
9 neoplasms and Kaposi sarcomas were classified according to the ICD for Oncology, 3rd  
10  
11 edition. Dates of HIV and acquired immunodeficiency syndrome (AIDS) notifications were  
12  
13 ascertained by linkage with the National HIV Database (1985–2007) and the National AIDS  
14  
15 Register (1982–2007), respectively. Linkage with the NSW Health Notifiable Conditions  
16  
17 Information Management System (1993–2007) identified dates of HBV and HCV  
18  
19 notifications for the sub-cohort, based on detection of HBV surface antigen or HBV DNA  
20  
21 and anti-HCV antibody or HCV RNA, respectively.  
22  
23  
24  
25  
26

27 The name, sex, date of birth, date of death, and state of residence of registrants were used for  
28  
29 record linkage. All linkages used probabilistic matching techniques except the HIV/AIDS  
30  
31 linkage which used deterministic methods because only the first two letters of the given name  
32  
33 and surname, not full name, were recorded on these registers.  
34  
35  
36  
37

38 Cancer incidence rates for the Australian population were obtained from the Australian  
39  
40 Cancer Database by five-year age group, sex, calendar year, and state/territory, for 1985 to  
41  
42 2007.  
43  
44  
45  
46

### 47 **Data analysis**

#### 48 **Cancer incidence**

49  
50 Person-years of follow-up accumulated from the date of first OST registration and terminated  
51  
52 at the first occurrence of cancer diagnosis, death, age 80, interstate transfer (for BBV  
53  
54 analyses only), or 31st December 2007.  
55  
56  
57  
58  
59  
60

1  
2  
3  
4  
5 Crude and age/sex-standardised cancer incidence rates, standardised to the 1996 Australian  
6 population, and Poisson 95% confidence intervals (CIs) were calculated using annual  
7 Australian population estimates from the Australian Bureau of Statistics. To describe overall  
8 cancer incidence trends over time the average annual per cent change (AAPC) was estimated  
9 using Poisson regression.<sup>11</sup>  
10  
11  
12  
13  
14  
15  
16  
17  
18

### 19 Relative risk of cancer

20 Risk of cancer overall and for each cancer type were examined in the full cohort (1985–2007)  
21 and the sub-cohort (1993–2007) using the standardised incidence ratio (SIR), the ratio of the  
22 observed and the expected numbers of cancers. The expected numbers of incident cancers  
23 were calculated by multiplying cohort person-years at risk by five-year age-, sex-, state-, and  
24 calendar year-specific population cancer incidence rates. The exception was Kaposi sarcoma,  
25 where 1982 population rates were used to avoid the impact of AIDS on the incidence of this  
26 cancer. The SIRs were computed for cancer overall and for the most frequently occurring  
27 cancers by sex and age at follow-up (<40, 40–49, ≥50years). In addition, SIRs were  
28 calculated by BBV notification status; HIV with or without HBV or HCV; HBV  
29 monoinfection; HCV monoinfection; HBV/HCV co-infection; and HBV/HCV/HIV  
30 uninfected. BBV infection was examined in a time-dependent manner, accounting for change  
31 in notification status over time.  
32  
33  
34  
35  
36  
37  
38  
39  
40  
41  
42  
43  
44  
45  
46  
47  
48

49 For registrants with an AIDS notification only or an HIV notification occurring less than five  
50 years before the AIDS notification (n=59, 0.13%), the date of HIV infection was backdated to  
51 five years prior to the AIDS notification or to the date of cohort entry, whichever occurred  
52 later, to more accurately estimate the date of HIV infection. The resultant retrospectively  
53  
54  
55  
56  
57  
58  
59  
60

1  
2  
3 defined person-years were survival-adjusted by applying period-specific, all-age, sex-, and  
4  
5 site-specific cancer survival rates to account for those individuals with HIV infection who  
6  
7 may have developed cancer and subsequently died before being diagnosed with HIV.<sup>12</sup> A  
8  
9 similar adjustment was performed as a sensitivity analysis for liver cancer risk in those  
10  
11 notified with HCV, assuming a median age at infection of 25 years for injecting drug user  
12  
13 (IDU)-acquired infection<sup>13</sup> and backdating HCV infection up to 15 years.  
14  
15

16  
17  
18 We compared patterns of cancer risk for the BBV subgroups but could not compare SIRs  
19  
20 statistically because of the heterogeneity in subgroup age and sex distributions.<sup>14</sup>  
21  
22

23  
24  
25 Within-cohort risk factors were examined for the most frequently occurring cancers in the  
26  
27 sub-cohort (1993–2007); liver, lung, and non-Hodgkin lymphoma. Sex and the time-  
28  
29 dependent factors—current age, calendar year, and HBV, HCV, and HIV notification—were  
30  
31 *a priori* included in all multivariable models. Poisson regression was used to determine  
32  
33 incidence rate ratios (IRRs) with 95% CIs.  
34  
35

36  
37  
38 Analyses were performed using SAS<sup>®</sup> software v9.2 (SAS Institute Inc., Cary, NC, USA) and  
39  
40 Joinpoint Regression Program, v3.5 (Statistical Methodology and Applications Branch and  
41  
42 Data Modeling Branch, Surveillance Research Program, National Cancer Institute). Person-  
43  
44 years were calculated using the *%stratify* macro.<sup>15</sup>  
45  
46  
47  
48  
49  
50  
51

## 52 RESULTS

53  
54 After applying exclusion criteria, 45 412 individuals registered for OST between 1985 and  
55  
56 2007 were included in the study cohort (Table 1a). This cohort accumulated 481 936 person-  
57  
58  
59  
60

1  
2  
3 years of follow-up for cancer, a median of 9.9 person-years per registrant (interquartile range  
4 [IQR] 5.61 to 15.2; Table 1a). Two-thirds of the cohort was male. The median age at OST  
5 registration was 27 years and the median cumulative time on OST was 2.6 years (IQR 0.6 to  
6 6.5). A total of 423 (0.8%) registrants were notified with a HIV/AIDS diagnosis prior to or  
7 after OST registration.  
8  
9

10  
11  
12  
13  
14  
15  
16 We observed 819 (1.8%) incident primary cancers (803 first, 16 second cancers) after OST  
17 registration and the median age at diagnosis of first cancer was 43 (IQR 37 to 49) years.  
18  
19

20  
21  
22  
23 After applying further exclusion criteria, the sub-cohort with assessable hepatitis data  
24 comprised 29 613 participants entering OST between 1993 and 2007 (Table 1b). They were  
25 of similar age and sex as the full cohort (median age at OST registration, 26 years; 69%  
26 male). A total of 14 892 (50%) registrants were notified with HCV alone, 598 (2%) with  
27 HBV alone, and 898 (3%) with HBV and HCV. Over the 213 008 person-years of follow-up  
28 in the sub-cohort, 240 (0.8%) incident cancers were observed.  
29  
30  
31  
32  
33  
34  
35  
36  
37  
38

### 39 **Cancer incidence**

40  
41 For the period 1985 to 2007 the crude cancer incidence rate was 170 per 100 000 person-  
42 years (95% CI 159 to 182). The age-standardised rate was 349 per 100 000 person-years  
43 (95% CI 337 to 361) and the annual age-standardised rate increased significantly between  
44 1985 and 2007 (AAPC=9.4%, 95% CI 4.2 to 15%; p=0.001).  
45  
46  
47  
48  
49  
50

### 51 **Cancer risk**

52  
53 Risk of cancer overall was slightly higher in OST registrants compared to the Australian  
54 population (SIR=1.15, 95% CI 1.07 to 1.23). SIRs were significantly greater than unity for  
55  
56  
57  
58  
59  
60

1  
2  
3 cancers of the tonsil, anus and anal canal, liver, pancreas, larynx, trachea bronchus and lung,  
4  
5 vulva and cervix, Kaposi sarcoma, non-Hodgkin lymphoma and cancer of unknown primary  
6  
7 site (Figure 1). Conversely, SIRs were significantly less than unity for melanoma and cancers  
8  
9 of the colorectum, breast, prostate, brain and central nervous system and thyroid.

10  
11  
12  
13  
14 Risk of any cancer was significantly increased in men and in those more than 40 years of age  
15  
16 (Table 2). Liver and lung cancer risk was increased in men and women; liver cancer risk was  
17  
18 significantly increased only for those more than 40 years of age, while lung cancer risk was  
19  
20 increased regardless of attained age. Similarly, women of all ages experienced half the risk of  
21  
22 breast cancer.  
23

### 24 25 26 27 28 **Blood-borne viruses and cancer risk**

29  
30 Thirty-four cancers were observed in registrants notified with HIV (irrespective of infection  
31  
32 with other BBVs), with an SIR of 6.68 (95% CI 4.63 to 9.34; Figure 2). SIRs were  
33  
34 significantly greater than unity for several cancers, including Kaposi sarcoma, non-Hodgkin  
35  
36 lymphoma, and anal cancer.  
37

38  
39  
40  
41 In those notified with HCV monoinfection, the overall risk of cancer was not significantly  
42  
43 different from that of the general population (SIR=1.06, 95% CI 0.89 to 1.25; Figure 3) but  
44  
45 the SIR for liver cancer was 6.61 (95% CI 3.02 to 12.5). After adjusting for an assumed age  
46  
47 of HCV infection of 25 years and for survival, the SIR for liver cancer increased to 13.1  
48  
49 (95% CI 6.00 to 24.9). Risk of lung cancer and mouth cancer were also elevated. On the other  
50  
51 hand, breast cancer risk was decreased and while six prostate cancers were expected, none  
52  
53 were observed. Few cancers were observed in those notified with HBV (one case) or HBV-  
54  
55  
56  
57  
58  
59  
60

1  
2  
3 HCV co-infection (18 cases). The risk of liver cancer in individuals notified with HBV-HCV  
4  
5 co-infection was markedly elevated (SIR=35.9, 95% CI 7.41 to 105).  
6  
7

8  
9  
10 Registrants without a notification of BBV infection were at decreased risk of cancer overall  
11  
12 (SIR=0.68, 95% CI 0.54 to 0.84; Figure 3) and melanoma. In this subgroup, no infection-  
13  
14 related cancers occurred at rates significantly different to the general population; however the  
15  
16 risk of pancreatic cancer was significantly elevated.  
17  
18

19  
20  
21 In multivariable analyses adjusting for age, calendar year, sex and HCV, HBV, and HIV  
22  
23 notification status, age was an independent risk factor for the most frequently occurring  
24  
25 cancers (Table 3). Notification of HBV and HCV infection predicted risk of liver cancer, and  
26  
27 notification of HIV infection predicted risk of non-Hodgkin lymphoma. Notification of HCV  
28  
29 infection independently predicted risk of lung cancer.  
30  
31

## 32 33 34 **DISCUSSION**

35  
36 We found that cancer risk in opioid-dependent people registered for OST was significantly  
37  
38 increased for a number of cancers causally related to infection with oncogenic viruses,  
39  
40 smoking, and alcohol consumption. The excess cancer risk was almost entirely restricted to  
41  
42 those notified with a BBV infection, except for pancreatic cancer. The most common cancers  
43  
44 for which there was an excess risk were independently associated with increasing age and  
45  
46 infection by one or more BBVs; liver cancer (HCV, HBV), lung cancer (HCV), and non-  
47  
48 Hodgkin lymphoma (HIV). Cancer incidence also increased significantly over time,  
49  
50 highlighting cancer as an emerging public health concern for this population.  
51  
52  
53  
54

### 55 56 **Strengths and weaknesses**

57  
58  
59  
60

1  
2  
3 The strengths of this study include the large population size and the lengthy follow-up, which  
4 provided the statistical power to improve upon sparse knowledge of the cancer risk faced by  
5 the opioid dependent population. Additionally, use of national, population-based registers for  
6 ascertainment of cancer diagnoses, HIV/AIDS diagnoses, and deaths enabled unbiased and  
7 comprehensive follow-up of the cohort. On the other hand, although routine testing for BBV  
8 infection is recommended, it is likely that not all OST recipients were routinely tested, and  
9 use of the notification date in analysis underestimates the timing of the infection. We also  
10 lacked data on BBV treatment and HBV vaccination. Furthermore, it was not possible to  
11 determine serological clearance of HCV. Thus it is possible that we have misclassification  
12 with respect to BBV infection, meaning that we have under-estimated the association of  
13 chronic HCV infection with cancer in OST registrants.  
14  
15  
16  
17  
18  
19  
20  
21  
22  
23  
24  
25  
26  
27  
28

29  
30 In addition, this study was retrospective, relying upon linkage with routinely collected  
31 administrative data, and some false positive and negative linkages do occur. Nevertheless,  
32 quality assurance practices performed by the data linkage units can result in high sensitivity  
33 and specificity (e.g. hepatitis linkage sensitivity >99.9%, specificity 99.8%).<sup>16</sup> Given it is  
34 likely that around 50% of Australians with opioid dependence enter OST at some point,<sup>17</sup> our  
35 findings are likely to be generalisable to the broader opioid dependent population. Our cohort  
36 being a representative sample is supported by the similarity of BBV prevalence with NSP  
37 survey results.<sup>7</sup> With respect to other OST populations, our data may represent a conservative  
38 estimate of the public health burden given the markedly lower incidence of HIV infection in  
39 comparison to most other countries.<sup>18</sup>  
40  
41  
42  
43  
44  
45  
46  
47  
48  
49  
50  
51  
52  
53

## 54 **Context**

55  
56  
57  
58  
59  
60

1  
2  
3 This is the first population-based study of cancer incidence among people who are opioid  
4 dependent, and the first study to examine cancer incidence in relation to BBV infection. Of  
5 the two prior studies measuring cancer incidence in opioid dependent populations, one had  
6 very limited statistical power and examined a US cohort of mostly Hispanic injecting drug  
7 users with a high prevalence of HIV,<sup>19</sup> while the other studied Israeli OST recipients but did  
8 not link with a population-based death registry and examined risk for only eight cancer  
9 types.<sup>20</sup>  
10  
11  
12  
13  
14  
15  
16  
17  
18  
19

### 20 21 **Explanations**

22  
23 Apart from Kaposi sarcoma, the strongest excess cancer risk in those registered for OST was  
24 observed for liver cancer. Stratification by BBV notification and within-cohort risk factor  
25 analyses showed that this excess risk occurred only in those with BBV infection, especially  
26 HCV alone or HCV/HBV co-infection. Surveillance bias did not strongly affect our risk  
27 estimates, as only one liver cancer was diagnosed within six months of commencing OST.  
28  
29 Lung cancer risk was elevated in the cohort overall and in the subgroup with HCV. Whilst  
30 HCV notification independently predicted lung cancer risk, there is no evidence of a  
31 biological link and this result may indicate those with HCV smoke more heavily than those  
32 without HCV. Tobacco exposure may also explain the excess risk of mouth cancer in this  
33 subgroup. The excess risk of liver<sup>20</sup> and lung<sup>19,20</sup> cancer is consistent with prior evidence.  
34  
35  
36  
37  
38  
39  
40  
41  
42  
43  
44  
45  
46

47 An excess risk of Kaposi sarcoma, non-Hodgkin lymphoma, and anal cancer was observed in  
48 OST registrants overall, particularly those with HIV. These cancers have an established  
49 causal association with HIV-related immunosuppression and are likely to result from  
50 impaired immune surveillance in people with infection by Kaposi sarcoma-associated  
51 herpesvirus, Epstein-Barr virus, and HPV, respectively.<sup>21</sup> An excess risk of five non-AIDS-  
52  
53  
54  
55  
56  
57  
58  
59  
60



1  
2  
3 defining malignancies was also observed, supporting evidence that these cancers are  
4  
5 becoming increasingly important for those with HIV infection.<sup>22</sup>  
6  
7

8  
9  
10 A number of cancers occurred at rates significantly lower than in the matched general  
11  
12 population. For melanoma, two explanations are suggested. Firstly, Aboriginal Australians,  
13  
14 who experience one-tenth the risk of melanoma compared to non-Aboriginal Australians, are  
15  
16 over-represented in the OST population compared to the general population (11% vs. 1.5–  
17  
18 2.0%).<sup>23</sup> Secondly, 69% of a recent sample (n=154) of active IDUs in NSW reported a  
19  
20 history of incarceration,<sup>17</sup> which limits sun exposure, an established risk factor for melanoma.  
21  
22 Under-participation in population-based and other cancer screening programs may explain  
23  
24 the reduced risk of breast, colorectal and prostate cancer in OST recipients. However, only  
25  
26 4% of the total follow-up time was contributed by individuals who were age-eligible for these  
27  
28 programs, substantially weakening the case for attenuation in risk due to under-participation  
29  
30 in screening. A reduced risk of colorectal and breast cancer was observed in Israeli OST  
31  
32 recipients,<sup>20</sup> and there is some evidence that opioid use may impart a decreased risk of certain  
33  
34 cancers. For example, a side-effect of chronic opioid use is hypogonadism, resulting in low  
35  
36 oestrogen (women) and testosterone (men).<sup>24</sup> Low levels of these hormones may decrease  
37  
38 premenopausal breast cancer and prostate cancer risk, however the evidence is  
39  
40 inconclusive.<sup>25, 26</sup> Characteristics common to OST registrants, high parity and early age at  
41  
42 first pregnancy,<sup>17, 27</sup> both considered protective for breast cancer,<sup>28</sup> as well as reduced  
43  
44 prevalence of overweight and obesity,<sup>29</sup> may also contribute to the observed risk reduction.  
45  
46  
47  
48  
49  
50

## 51 **Implications**

52  
53  
54 The observed cancer risk profile strongly supports the implementation of targeted cancer  
55  
56 prevention strategies in the OST setting. Given the concentration of excess risk among those  
57  
58  
59  
60

1  
2  
3 with BBV notifications, and the high prevalence of HCV among this population, there is a  
4  
5 clear need for interventions that reduce HCV incidence<sup>4</sup> and that treat people who have  
6  
7 developed chronic infections.<sup>1</sup> NSPs are highly effective at reducing the rate of acquisition of  
8  
9 BBVs.<sup>4</sup> Antiviral treatments for HCV and HBV infection induce regression of fibrosis and  
10  
11 decrease liver cancer risk.<sup>30</sup> People with a history of injecting drug use respond positively to  
12  
13 HCV therapies, with acceptable levels of sustained virological response<sup>31</sup> and antiviral  
14  
15 therapy is also not contraindicated in people with HIV receiving OST. The issue, however, is  
16  
17 one of coverage. Many physicians remain unwilling to provide such treatments to people who  
18  
19 use illicit drugs in the face of evidence that they have similar levels of adherence to treatment  
20  
21 as other patient groups.<sup>32</sup> Thus, despite HCV being one of the strongest risk factors for cancer  
22  
23 in OST, very few people in OST have received treatment to address this risk.<sup>1</sup>  
24  
25  
26  
27  
28

29  
30 As the risks for cancers with established causal links to tobacco-smoking and alcohol use  
31  
32 were elevated, namely lung, larynx, and pancreatic cancer (smoking), and liver, oral, larynx,  
33  
34 and oesophageal cancer (alcohol), a reduction in these behaviours would similarly mitigate  
35  
36 cancer risk. OST clients show strong interest in smoking cessation programs,<sup>33</sup> and they do  
37  
38 not adversely impact OST,<sup>34</sup> but again few are offered such treatments in routine healthcare  
39  
40 settings. The excess risk of cancer of the cervix, vulva and anus, cancers caused by chronic  
41  
42 infection with HPV, may be reduced by safer sexual practices. The increased risk of cervical  
43  
44 cancer also supports the need for greater participation in cervical screening.  
45  
46  
47  
48

## 49 **Conclusions**

50  
51 Opioid-dependent people registered for OST face an excess risk of a variety of cancers  
52  
53 compared to the general population, in particular cancers associated with infection by BBVs.  
54  
55 The implementation of harm reduction strategies in the OST setting represents an evidently  
56  
57  
58  
59  
60

1  
2  
3 underutilised opportunity to respond to the escalating cancer burden facing this marginalised  
4  
5 population.  
6  
7  
8  
9  
10  
11  
12  
13  
14  
15  
16  
17  
18  
19  
20  
21  
22  
23  
24  
25  
26  
27  
28  
29  
30  
31  
32  
33  
34  
35  
36  
37  
38  
39  
40  
41  
42  
43  
44  
45  
46  
47  
48  
49  
50  
51  
52  
53  
54  
55  
56  
57  
58  
59  
60

For peer review only

1  
2  
3 **LIST OF FIGURE LEGENDS**  
4

5 **Figure 1** Risk of cancer among NSW opioid substitution therapy registrants, 1985–2007  
6

7  
8 Key  
9

10 Obs=observed number of cancers. Exp=expected number of cancers. SIR=standardised  
11 incidence ratio. CI=confidence interval. CNS=central nervous system.  
12

13  
14  
15 \*Includes non-Hodgkin lymphoma not otherwise specified (International Classification of  
16 Diseases for Oncology, 3rd edition: 9590).  
17

18  
19  
20 Non-melanoma skin cancer excludes diagnoses of basal cell and squamous cell carcinoma.  
21  
22  
23  
24

25  
26 **Figure 2** Risk of cancer in NSW opioid substitution therapy registrants with notified HIV  
27 infection, 1985–2007  
28

29  
30 Key  
31

32 Obs=observed number of cancers. Exp=expected number of cancers. SIR=standardised  
33 incidence ratio. CI=confidence interval.  
34  
35

36  
37  
38 \*Includes non-Hodgkin lymphoma not otherwise specified (International Classification of  
39 Diseases for Oncology, 3rd edition: 9590).  
40  
41  
42  
43  
44  
45

46 **Figure 3** Risk of cancer among NSW opioid substitution therapy registrants with notified  
47 hepatitis C infection and registrants without notified hepatitis B, hepatitis C or HIV infection,  
48 1993–2007  
49  
50

51  
52 Key  
53

54  
55 \*Includes non-Hodgkin lymphoma not otherwise specified (International Classification of Diseases  
56 for Oncology, 3rd edition: 9590)  
57  
58  
59  
60

†SIRs not estimated for cancers with less than 3 observed cases

For peer review only

**Table 1a** Characteristics of all NSW opioid substitution therapy registrants and those with notified HIV infection, 1985–2007

|                                    | Entire cohort          |              |                  | HIV infection          |              |                  |
|------------------------------------|------------------------|--------------|------------------|------------------------|--------------|------------------|
|                                    | No. (%) of registrants | Person-years |                  | No. (%) of registrants | Person-years |                  |
|                                    |                        | Total        | Median (IQR)     |                        | Total        | Median (IQR)     |
| <b>Total</b>                       | 45 412 (100)           | 481 936      | 9.94 (5.61–15.2) | 426 (100)              | 3511         | 7.60 (3.66–12.4) |
| <b>Sex</b>                         |                        |              |                  |                        |              |                  |
| Men                                | 30 147 (66.4)          | 310 632      | 9.67 (5.31–14.8) | 346 (81.2)             | 2796         | 7.58 (3.63–11.8) |
| Women                              | 15 265 (33.6)          | 171 304      | 10.6 (6.30–16.2) | 80 (18.8)              | 715          | 7.68 (3.72–14.6) |
| <b>Age at cohort entry (years)</b> |                        |              |                  |                        |              |                  |
| <25                                | 16 266 (35.8)          | 166 503      | 9.48 (5.83–14.0) | 139 (32.6)             | 1176         | 7.38 (3.87–13.0) |
| 25–30                              | 14 680 (32.3)          | 171 073      | 11.3 (6.26–17.4) | 120 (28.2)             | 1027         | 7.96 (3.75–11.7) |
| ≥31                                | 14 466 (31.9)          | 144 361      | 9.46 (4.86–14.4) | 167 (39.2)             | 1308         | 7.25 (2.83–12.7) |
| <b>Year of cohort entry</b>        |                        |              |                  |                        |              |                  |
| 1985–1989                          | 8476 (18.7)            | 161 566      | 20.4 (18.7–21.8) | 75 (17.6)              | 887          | 10.2 (6.02–19.2) |
| 1990–1995                          | 11 220 (24.7)          | 152 938      | 14.1 (12.7–15.7) | 140 (32.9)             | 1479         | 12.8 (5.99–14.8) |
| 1996–2001                          | 15 302 (33.7)          | 133 232      | 8.84 (7.35–10.4) | 122 (28.6)             | 908          | 8.00 (6.33–9.65) |
| 2002–2007                          | 10 414 (22.9)          | 34 200       | 3.44 (1.88–4.81) | 89 (20.9)              | 237          | 2.72 (1.22–3.89) |

1  
2  
3  
4  
5  
6  
7  
8  
9  
10  
11  
12  
13  
14  
15  
16  
17  
18  
19  
20  
21  
22  
23  
24  
25  
26  
27  
28  
29  
30  
31  
32  
33  
34  
35  
36  
37  
38  
39  
40  
41  
42  
43  
44  
45  
46  
47  
48  
49

**Table 1b** Characteristics of NSW opioid substitution therapy registrants, by BBV notification status, 1993–2007

|                                    | Entire sub-cohort       |              | No BBV infection |                        | HBV mono-infection |        | HCV mono-infection     |              | HBV/HCV co-infection |                        | HIV infection <sup>†</sup> |        |            |      |      |            |      |      |
|------------------------------------|-------------------------|--------------|------------------|------------------------|--------------------|--------|------------------------|--------------|----------------------|------------------------|----------------------------|--------|------------|------|------|------------|------|------|
|                                    | No. (%) of registrants* | Person-years |                  | No. (%) of registrants | Person-years       |        | No. (%) of registrants | Person-years |                      | No. (%) of registrants | Person-years               |        |            |      |      |            |      |      |
|                                    |                         | Total        | Median           |                        | Total              | Median |                        | Total        | Median               |                        | Total                      | Median |            |      |      |            |      |      |
| <b>Total</b>                       | 29 613 (100)            | 213 008      | 7.28             | 23 650 (100)           | 109 313            | 3.53   | 598 (100)              | 2608         | 3.56                 | 14 892 (100)           | 94 331                     | 6.36   | 898 (100)  | 5249 | 6.02 | 234 (100)  | 1504 | 6.20 |
| <b>Sex</b>                         |                         |              |                  |                        |                    |        |                        |              |                      |                        |                            |        |            |      |      |            |      |      |
| Men                                | 20 348 (68.7)           | 144 932      | 7.19             | 16 352 (69.1)          | 76 495             | 3.64   | 436 (72.9)             | 1918         | 3.60                 | 9793 (65.8)            | 61 378                     | 6.29   | 643 (71.6) | 3782 | 6.10 | 204 (87.2) | 1355 | 6.55 |
| Women                              | 9265 (31.3)             | 68 076       | 7.51             | 7298 (30.9)            | 32 818             | 3.25   | 162 (27.1)             | 691          | 3.50                 | 5099 (34.2)            | 32 953                     | 6.47   | 255 (28.4) | 1466 | 5.94 | 30 (12.8)  | 148  | 4.35 |
| <b>Age at cohort entry (years)</b> |                         |              |                  |                        |                    |        |                        |              |                      |                        |                            |        |            |      |      |            |      |      |
| 15–25                              | 11 674 (39.4)           | 87 088       | 7.60             | 9915 (41.9)            | 47 340             | 3.81   | 278 (46.5)             | 1282         | 3.96                 | 5706 (38.3)            | 35 963                     | 6.41   | 351 (39.1) | 2130 | 6.27 | 61 (26.1)  | 373  | 6.08 |
| 25–30                              | 8427 (28.5)             | 60 907       | 7.32             | 6771 (28.6)            | 31 905             | 3.56   | 169 (28.3)             | 770          | 3.18                 | 4106 (27.6)            | 26 201                     | 6.42   | 266 (29.6) | 1534 | 5.79 | 68 (29.1)  | 494  | 7.73 |
| 31–40                              | 9512 (32.1)             | 65 013       | 6.74             | 6964 (29.4)            | 30 068             | 3.06   | 151 (25.3)             | 555          | 3.39                 | 5080 (34.1)            | 32 167                     | 6.23   | 281 (31.3) | 1584 | 5.71 | 105 (44.9) | 637  | 5.17 |
| <b>Year of cohort entry</b>        |                         |              |                  |                        |                    |        |                        |              |                      |                        |                            |        |            |      |      |            |      |      |
| 1993–1997                          | 10 212 (34.5)           | 111 454      | 11.7             | 8944 (37.8)            | 54 619             | 4.76   | 158 (26.4)             | 981          | 5.08                 | 3563 (23.9)            | 36 132                     | 11.2   | 129 (14.4) | 1298 | 10.9 | 84 (35.9)  | 754  | 10.7 |
| 1998–2002                          | 11 655 (39.4)           | 81 399       | 7.36             | 8962 (37.9)            | 42 095             | 5.35   | 290 (48.5)             | 1304         | 5.12                 | 6958 (46.7)            | 47 049                     | 7.05   | 475 (52.9) | 3167 | 6.80 | 82 (35.0)  | 573  | 7.55 |
| 2003–2007                          | 7746 (26.2)             | 20 155       | 2.70             | 5744 (24.3)            | 12 599             | 2.11   | 150 (25.1)             | 323          | 2.01                 | 4371 (29.4)            | 11 150                     | 2.55   | 294 (32.7) | 784  | 2.75 | 68 (29.1)  | 177  | 2.71 |

\*Category numbers will not sum to total numbers for the sub-cohort as individuals were followed-up in a time-dependent manner, allowing an individual to contribute person-years to multiple groups as their BBV notification status changed over the period of observation.

†With or without HBV or HCV notification.

**Table 2** Risk of any cancer and the most frequently occurring cancers in NSW opioid substitution therapy registrants, by sex and current age (1985–2007)

| Cancer type                        | Obs. | Exp. | SIR  | 95% CI    |
|------------------------------------|------|------|------|-----------|
| <b>All cancer</b>                  |      |      |      |           |
| Men                                | 536  | 431  | 1.24 | 1.14–1.35 |
| Women                              | 283  | 285  | 0.99 | 0.88–1.11 |
| <40 yrs                            | 282  | 295  | 0.96 | 0.85–1.07 |
| 40–49 yrs                          | 357  | 282  | 1.27 | 1.14–1.40 |
| ≥50 yrs                            | 180  | 139  | 1.30 | 1.12–1.50 |
| <b>Liver</b>                       |      |      |      |           |
| Men                                | 51   | 6.92 | 7.37 | 5.49–9.69 |
| Women                              | 12   | 0.91 | 13.2 | 6.80–23.0 |
| <40 yrs                            | 4    | 1.62 | 2.47 | 0.67–6.33 |
| 40–49 yrs                          | 26   | 3.96 | 6.57 | 4.29–9.63 |
| ≥50 yrs                            | 33   | 2.26 | 14.6 | 10.1–20.6 |
| <b>Trachea, bronchus, and lung</b> |      |      |      |           |
| Men                                | 82   | 19.8 | 4.15 | 3.32–5.11 |
| Women                              | 28   | 7.59 | 3.69 | 2.45–5.33 |
| <40 yrs                            | 15   | 4.11 | 3.65 | 2.04–6.02 |
| 40–49 yrs                          | 58   | 13.0 | 4.46 | 3.41–5.71 |
| ≥50 yrs                            | 37   | 10.2 | 3.61 | 2.57–4.90 |
| <b>Melanoma</b>                    |      |      |      |           |
| Men                                | 64   | 91.2 | 0.70 | 0.54–0.89 |
| Women                              | 37   | 48.7 | 0.76 | 0.54–1.03 |
| <40 yrs                            | 48   | 71.6 | 0.67 | 0.50–0.88 |
| 40–49 yrs                          | 37   | 51.4 | 0.72 | 0.51–0.98 |
| ≥50 yrs                            | 16   | 16.9 | 0.95 | 0.56–1.49 |
| <b>Female breast</b>               |      |      |      |           |
| <40 yrs                            | 15   | 32.5 | 0.46 | 0.27–0.74 |
| 40–49 yrs                          | 27   | 54.3 | 0.48 | 0.32–0.69 |
| ≥50 yrs                            | 6    | 14.1 | 0.43 | 0.17–0.86 |
| <b>Cervical</b>                    |      |      |      |           |
| <40 yrs                            | 21   | 11.0 | 1.90 | 1.20–2.84 |
| 40–49 yrs                          | 14   | 4.67 | 3.00 | 1.64–5.03 |
| ≥50 yrs                            | 2    | 0.63 | 3.19 | 0.39–11.5 |
| <b>Non-Hodgkin lymphoma</b>        |      |      |      |           |
| Men                                | 62   | 38.1 | 1.63 | 1.26–2.07 |
| Women                              | 13   | 11.5 | 1.13 | 0.62–1.86 |
| <40 yrs                            | 25   | 20.9 | 1.20 | 0.79–1.73 |
| 40–49 yrs                          | 37   | 19.8 | 1.87 | 1.33–2.54 |
| ≥50 yrs                            | 13   | 8.94 | 1.46 | 0.78–2.49 |

Obs=observed number of cancers. Exp=expected number of cancers. SIR=standardised incidence ratio. CI=confidence interval.



**Table 3** Multivariable analysis of risk factors for common cancers among NSW opioid substitution therapy registrants, 1993-2007

|                                     | Lung Cancer |      |           |         | Non-Hodgkin lymphoma |      |           |         | Liver Cancer |      |           |         |
|-------------------------------------|-------------|------|-----------|---------|----------------------|------|-----------|---------|--------------|------|-----------|---------|
|                                     | n           | IRR* | 95%CI     | P       | n                    | IRR* | 95%CI     | P       | n            | IRR* | 95%CI     | P       |
| Current age <sup>†</sup>            | 27          | 1.19 | 1.15–1.24 | <0.0001 | 23                   | 1.06 | 1.01–1.11 | 0.025   | 13           | 1.20 | 1.13–1.27 | <0.0001 |
| Calendar year <sup>†</sup>          | 27          | 0.91 | 0.81–1.03 | 0.131   | 23                   | 1.16 | 1.01–1.37 | 0.054   | 13           | 1.13 | 0.91–1.49 | 0.317   |
| Sex                                 |             |      |           |         |                      |      |           |         |              |      |           |         |
| Men                                 | 22          | 1.55 | 0.63–4.65 | 0.378   | 17                   | 1.03 | 0.42–2.90 | 0.954   | 12           | 3.94 | 0.76–72.2 | 0.190   |
| Women (ref)                         | 5           | 1.00 |           |         | 6                    | 1.00 |           |         | 1            | 1.00 |           |         |
| Notified HCV infection              |             |      |           |         |                      |      |           |         |              |      |           |         |
| Yes                                 | 21          | 3.29 | 1.39–9.07 | 0.011   | 13                   | 1.12 | 0.49–2.65 | 0.792   | 12           | 9.05 | 1.73–166  | 0.036   |
| No (ref)                            | 6           | 1.00 |           |         | 10                   | 1.00 |           |         | 1            | 1.00 |           |         |
| Notified HBV infection <sup>‡</sup> |             |      |           |         |                      |      |           |         |              |      |           |         |
| Yes                                 | 2           | 1.59 | 0.25–5.42 | 0.531   | 0                    | -    |           |         | 3            | 4.63 | 1.03–15.4 | 0.021   |
| No (ref)                            | 25          | 1.00 |           |         | 23                   |      |           |         | 10           | 1.00 |           |         |
| Notified HIV infection <sup>‡</sup> |             |      |           |         |                      |      |           |         |              |      |           |         |
| Yes                                 | 0           | -    |           |         | 4                    | 26.0 | 7.40–71.3 | <0.0001 | 0            | -    |           |         |
| No (ref)                            | 27          |      |           |         | 19                   | 1.00 |           |         | 13           |      |           |         |

IRR=incidence rate ratio. CI=confidence interval. Ref=reference group in analysis.

\*Adjusted for current age (years), calendar year, sex and time-dependent HCV notification status, HBV notification status and HIV notification status

<sup>†</sup>IRR refers to one year increase

<sup>‡</sup>IRRs could not be calculated if a cancer case did not occur in one of the binary groupings

Note: Infection groupings are not mutually exclusive

## ACKNOWLEDGEMENTS

We thank the NSW Ministry of Health for providing the Pharmaceutical Drugs of Addiction System data, and Pia Salmelainen of the Pharmaceutical Services Branch, NSW Health, for her assistance with data extraction and interpretation. We are also grateful to the staff of the state and territory cancer registries and Health Departments for the use of their data on cancer and notifiable diseases respectively. We thank the Australian Institute of Health and Welfare and the Centre for Health Record Linkage for conducting the data linkage. We are indebted to Preeyaporn Srasuebkul, Michael Falster, and Sadaf Marashi-Pour for biostatistical advice and assistance.

## CONTRIBUTORS

The study was conceived and designed by CMV, LB and LD. The data were obtained from data custodians by LM, NSM and CMV. All authors contributed to the analytical plans. The data were prepared and analysed by AS. AS, CMV and LD drafted the paper. All authors reviewed, revised and approved the final draft. CMV is the guarantor.

## FUNDING

National Health and Medical Research Council (NHMRC; ID630531) and Faculty of Medicine, University of New South Wales. AEG is supported by an NHMRC principal research fellowship (ID568819). LD is supported by an NHMRC Senior Research Fellowship (ID510279). CMV is supported by an NHMRC Career Development Fellowship (ID1023159) and a Cancer Institute New South Wales Career Development Fellowship (ID10/CDF/2-42). The funding bodies played no role in the study design or conduct, data collection, analysis or interpretation of data, in the writing of the article or the decision to submit the article for publication.

**COMPETING INTERESTS**

All authors report no disclosures.

**ETHICS APPROVAL**

The study was reviewed and approved by all relevant ethics committees and the requirement for informed consent was waived because the researchers received only de-identified data.

**DATA SHARING STATEMENT**

There is no additional data available.

## REFERENCES

1. Nelson PK, Mathers BM, Cowie B, *et al*. Global epidemiology of hepatitis B and hepatitis C in people who inject drugs: results of systematic reviews. *Lancet* 2011;378:571-83.
2. Best D, Lehmann P, Gossop M, *et al*. Eating too little, smoking and drinking too much: wider lifestyle problems among methadone maintenance patients. *Addic Res Theory* 1998;6:89-98.
3. Plitt SS, Sherman SG, Viscidi RP, *et al*. Human papillomavirus seroprevalence among young male and female drug users. *Sex Transm Dis* 2007;34:676-80.
4. Degenhardt L, Mathers BM, Vickerman P, *et al*. Prevention of HIV infection for people who inject drugs: why individual, structural, and combination approaches are needed. *Lancet* 2010;376:285-301.
5. Bell J, Burrell T, Indig D, *et al*. Cycling in and out of treatment; participation in methadone treatment in NSW, 1990–2002. *Drug Alcohol Depend* 2006;81:55-61.
6. Degenhardt L, Bucello C, Mathers B, *et al*. Mortality among regular or dependent users of heroin and other opioids: a systematic review and meta-analysis of cohort studies. *Addiction* 2011;106:32-51.
7. The Kirby Institute. HIV, viral hepatitis and sexually transmissible infections in Australia Annual Surveillance Report 2011. Sydney, NSW: The Kirby Institute, the University of New South Wales 2011.
8. Ferreros I, Lumbreras B, Hurtado I, *et al*. The shifting pattern of cause-specific mortality in a cohort of human immunodeficiency virus-infected and non-infected injecting drug users. *Addiction* 2008;103:651-9.
9. Brambilla G, Martelli A. Genotoxicity and carcinogenicity studies of analgesics, anti-inflammatory drugs and antipyretics. *Pharmacol Res* 2009;60:1-17.

10. Rosenkrantz H, Fleischman RW. In vivo carcinogenesis assay of DL-methadone.HCl in rodents. *Fundam Appl Toxicol* 1988;11:640-51.
11. Clegg LX, Hankey BF, Tiwari R, *et al.* Estimating average annual per cent change in trend analysis. *Stat Med* 2009;28:3670-82.
12. Grulich AE, Wan X, Law MG, *et al.* Risk of cancer in people with AIDS. *AIDS* 1999;13:839-43.
13. Amin J, Dore GJ, O'Connell DL, *et al.* Cancer incidence in people with hepatitis B or C infection: A large community-based linkage study. *J Hepatol* 2006;45:197-203.
14. Rothman KJ, Greenland, S., Lash, T.L. *Modern Epidemiology*. 3rd edition. Philadelphia: Lippincott Williams & Wilkins 2008.
15. Rostgaard K. Methods for stratification of person-time and events - a prerequisite for Poisson regression and SIR estimation. *Epidemiol Perspect Innov* 2008;5:7.
16. Kariminia A, Butler T, Corben S, *et al.* Mortality among prisoners: how accurate is the Australian National Death Index? *Aust NZ J Pub Health* 2005;29:572-5.
17. Stafford J, Burns L. *Australian Drug Trends 2010. Findings from the Illicit Drug Reporting System (IDRS)*. Sydney: National Drug and Alcohol Research Centre, UNSW 2011.
18. Mathers BM, Degenhardt L, Phillips B, *et al.* Global epidemiology of injecting drug use and HIV among people who inject drugs: a systematic review. *Lancet* 2008;372:1733-45.
19. Gachupin-Garcia A, Selwyn PA, Budner NS. Population-based study of malignancies and HIV infection among injecting drug users in a New York City methadone treatment program, 1985-1991. *AIDS* 1992;6:843-8.
20. Grinshpoon A, Barchana M, Lipshitz I, *et al.* Methadone maintenance and cancer risk: An Israeli case registry study. *Drug Alcohol Depend* 2011;119:88-92.

- 1  
2  
3 21. Bouvard V, Baan R, Straif K, *et al.* A review of human carcinogens - Part B:  
4  
5 Biological agents. *Lancet Oncology* 2009;10:321-2.  
6  
7 22. Shiels MS, Pfeiffer RM, Gail MH, *et al.* Cancer Burden in the HIV-Infected  
8  
9 Population in the United States. *J Natl Cancer Inst* 2011;103:753-62.  
10  
11 23. Australian Institute of Health and Welfare. National Opioid Pharmacotherapy  
12  
13 Statistics Annual Data Collection: 2010 report. Canberra, ACT: AIHW 2011.  
14  
15 24. Reddy RG, Aung T, Karavitaki N, *et al.* Opioid induced hypogonadism. *BMJ*  
16  
17 2010;341:c4462.  
18  
19 25. Eliassen A, Spiegelman D, Xu X, *et al.* Urinary estrogens and estrogen metabolites  
20  
21 and subsequent risk of breast cancer among premenopausal women. *Cancer Res*  
22  
23 2012;72:696-706.  
24  
25 26. Roddam A, Allen N, Appleby P, *et al.* Endogenous sex hormones and prostate cancer:  
26  
27 a collaborative analysis of 18 prospective studies. *J Natl Cancer Inst* 2008;100:170-  
28  
29 83.  
30  
31 27. Burns L, Mattick RP, Cooke M. The use of record linkage to examine illicit drug use  
32  
33 in pregnancy. *Addiction* 2006;101:873-82.  
34  
35 28. Kelsey JL, Gammon MD, John EM. Reproductive factors and breast cancer.  
36  
37 *Epidemiol Rev* 1993;15:36-47.  
38  
39 29. Hsieh C-C, Trichopoulos D, Katsouyanni K, *et al.* Age at menarche, age at  
40  
41 menopause, height and obesity as risk factors for breast cancer: Associations and  
42  
43 interactions in an international case-control study. *Int J Cancer* 1990;46:796-800.  
44  
45 30. Chander G, Sulkowski MS, Jenckes MW, *et al.* Treatment of chronic hepatitis C: A  
46  
47 systematic review. *Hepatology* 2002;36:s135-44.  
48  
49 31. Novick DM, Kreek MJ. Critical issues in the treatment of hepatitis C virus infection  
50  
51 in methadone maintenance patients. *Addiction* 2008;103:905-18.  
52  
53  
54  
55  
56  
57  
58  
59  
60

- 1  
2  
3 32. Mehta SH, Genberg BL, Astemborski J, *et al.* Limited uptake of hepatitis C treatment  
4 among injection drug users. *J Community Health* 2008;33:126-33.  
5  
6  
7 33. Clarke JG, Stein MD, McGarry KA, *et al.* Interest in smoking cessation among  
8 injection drug users. *Am J Addict* 2001;10:159-66.  
9  
10  
11 34. Reid MS, Fallon B, Sonne S, *et al.* Smoking cessation treatment in community-based  
12 substance abuse rehabilitation programs. *J Subst Abuse Treat* 2008;35:68-77.  
13  
14  
15  
16  
17  
18  
19  
20  
21  
22  
23  
24  
25  
26  
27  
28  
29  
30  
31  
32  
33  
34  
35  
36  
37  
38  
39  
40  
41  
42  
43  
44  
45  
46  
47  
48  
49  
50  
51  
52  
53  
54  
55  
56  
57  
58  
59  
60

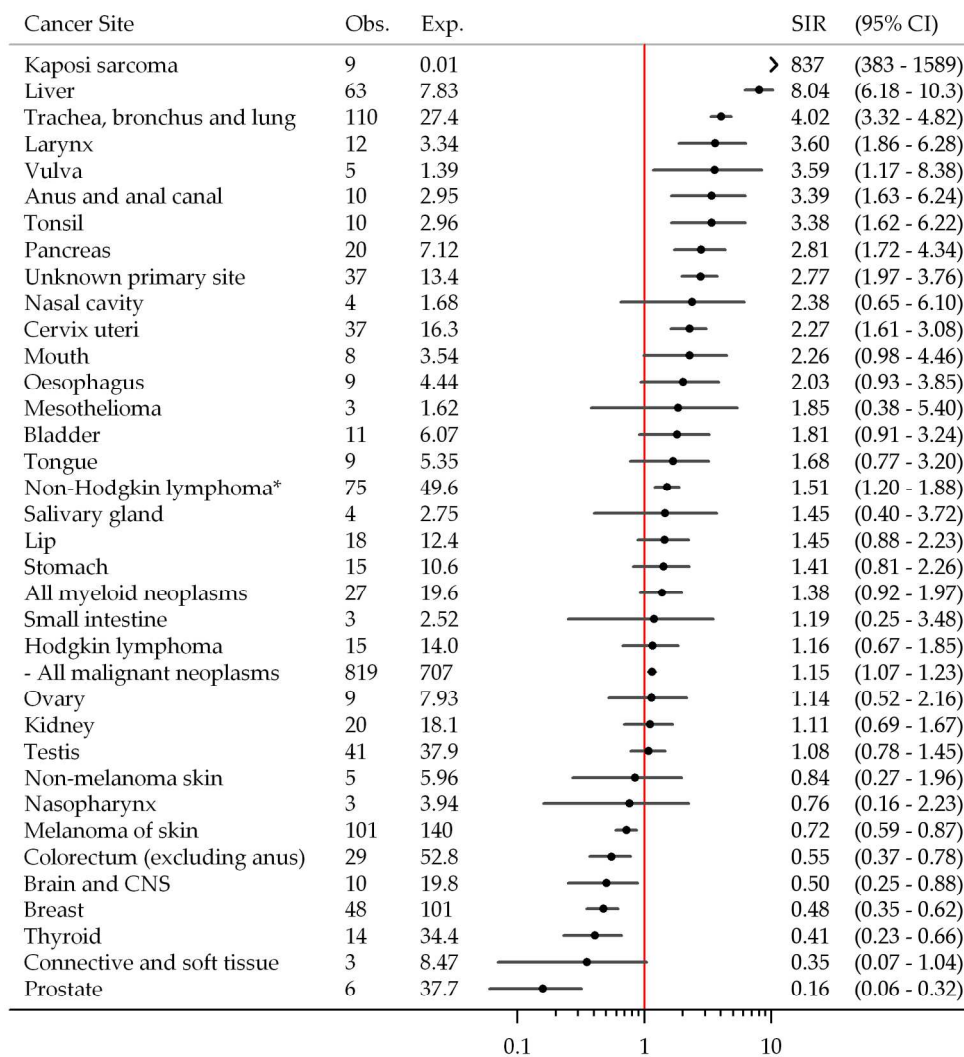

Figure 1 Risk of cancer among NSW opioid substitution therapy registrants, 1985–2007  
529x587mm (96 x 96 DPI)



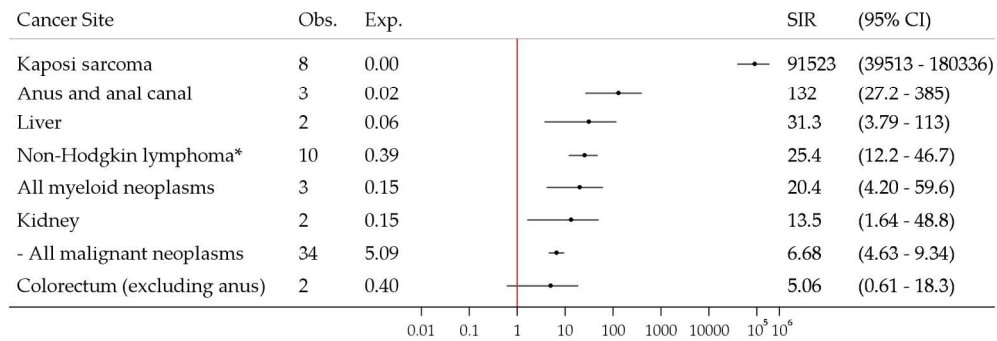

Figure 2 Risk of cancer in NSW opioid substitution therapy registrants with notified HIV infection, 1985–2007  
492x169mm (96 x 96 DPI)

peer review only

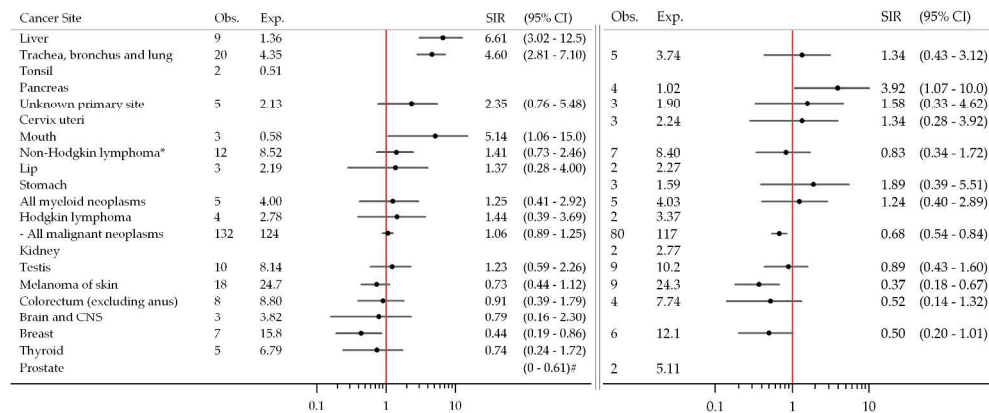

Figure 3 Risk of cancer among NSW opioid substitution therapy registrants with notified hepatitis C infection and registrants without notified hepatitis B, hepatitis C or HIV infection, 1993–2007  
872x360mm (96 x 96 DPI)



**The importance of blood borne viruses in elevated cancer risk among opioid dependent people: a population-based cohort study**

|                                 |                                                                                                                                                                                                                                                                                                                                                                                                                                                                                                                                                                                                                                                                                                                                                                                       |
|---------------------------------|---------------------------------------------------------------------------------------------------------------------------------------------------------------------------------------------------------------------------------------------------------------------------------------------------------------------------------------------------------------------------------------------------------------------------------------------------------------------------------------------------------------------------------------------------------------------------------------------------------------------------------------------------------------------------------------------------------------------------------------------------------------------------------------|
| Journal:                        | <i>BMJ Open</i>                                                                                                                                                                                                                                                                                                                                                                                                                                                                                                                                                                                                                                                                                                                                                                       |
| Manuscript ID:                  | bmjopen-2012-001755.R1                                                                                                                                                                                                                                                                                                                                                                                                                                                                                                                                                                                                                                                                                                                                                                |
| Article Type:                   | Research                                                                                                                                                                                                                                                                                                                                                                                                                                                                                                                                                                                                                                                                                                                                                                              |
| Date Submitted by the Author:   | 20-Aug-2012                                                                                                                                                                                                                                                                                                                                                                                                                                                                                                                                                                                                                                                                                                                                                                           |
| Complete List of Authors:       | Swart, Alexander; University of New South Wales, Prince of Wales Clinical School<br>Burns, Lucinda; University of New South Wales, National Drug and Alcohol Research Centre<br>Mao, Limin; University of New South Wales, National Centre in HIV Social Research<br>Grulich, Andrew; National Centre in HIV Epidemiology<br>Amin, Janaki; University of New South Wales, Kirby Institute<br>O'Connell, Dianne; The Cancer Council NSW, Cancer Epidemiology Research Unit<br>Meagher, Nicola; University of New South Wales, Prince of Wales Clinical School<br>Randall, Deborah; University of Western Sydney,<br>Degenhardt, Louisa; University of NSW, National Drug and Alcohol Research Centre<br>Vajdic, Claire; University of New South Wales, Prince of Wales Clinical School |
| <b>Primary Subject Heading</b>: | Public health                                                                                                                                                                                                                                                                                                                                                                                                                                                                                                                                                                                                                                                                                                                                                                         |
| Secondary Subject Heading:      | Oncology, Addiction, Epidemiology, Infectious diseases                                                                                                                                                                                                                                                                                                                                                                                                                                                                                                                                                                                                                                                                                                                                |
| Keywords:                       | Public health < INFECTIOUS DISEASES, Epidemiology < ONCOLOGY, PUBLIC HEALTH                                                                                                                                                                                                                                                                                                                                                                                                                                                                                                                                                                                                                                                                                                           |
|                                 |                                                                                                                                                                                                                                                                                                                                                                                                                                                                                                                                                                                                                                                                                                                                                                                       |

SCHOLARONE™  
Manuscripts

1  
2  
3 **The importance of blood-borne viruses in elevated cancer risk among opioid dependent**  
4 **people: a population-based cohort study**  
5  
6  
7  
8

9 Alexander Swart<sup>1</sup>, Lucinda Burns<sup>2</sup>, Limin Mao<sup>3</sup>, Andrew E. Grulich<sup>4</sup>, Janaki Amin<sup>4</sup>, Dianne  
10 L. O'Connell<sup>5,6,7,8</sup>, Nicola S. Meagher<sup>1</sup>, Deborah A. Randall<sup>9</sup>, Louisa Degenhardt<sup>2,10</sup>, Claire  
11 M. Vajdic<sup>1</sup>  
12  
13  
14  
15

16  
17  
18 1 Adult Cancer Program, Lowy Cancer Research Centre, Prince of Wales Clinical School,  
19 Faculty of Medicine at the University of New South Wales, NSW 2052, Australia.  
20

21  
22 2 National Drug and Alcohol Research Centre, Faculty of Medicine at the University of New  
23 South Wales, NSW 2052, Australia  
24  
25

26  
27 3 National Centre in HIV Social Research, Faculty of Arts and Social Sciences at the  
28 University of New South Wales, NSW 2052, Australia  
29

30  
31 4 Kirby Institute, Faculty of Medicine at the University of New South Wales, NSW 2052,  
32 Australia  
33  
34

35  
36 5 Cancer Research Division, Cancer Council NSW, NSW 2011, Australia  
37

38 6 School of Medicine and Public Health, Faculty of Health, University of Newcastle  
39

40 7 School of Public Health and Community Medicine, University of New South Wales, NSW  
41 2052, Australia  
42  
43

44 8 Sydney Medical School – Public Health, University of Sydney, NSW 2006, Australia  
45

46 9 School of Medicine, University of Western Sydney, NSW 2751, Australia  
47

48 10 Centre for Health Policy, Programs and Economics, School of Population Health,  
49 University of Melbourne, Victoria 3010, Australia  
50  
51  
52  
53  
54  
55  
56  
57  
58  
59  
60

**Corresponding author**

Claire M. Vajdic, Adult Cancer Program, Lowy Cancer Research Centre, University of New South Wales, NSW 2052, Australia. Phone (61-2) 9385 1424; fax (61-2) 9385 1430; email: claire.vajdic@unsw.edu.au

**Key words**

Cancer risk, opioid dependence, pharmacotherapy, opioid substitution therapy, blood-borne viruses.

Word count (abstract): 286

Word count (text): 3264

Number of tables: 4

Number of figures: 3

Number of references: 34

## ARTICLE SUMMARY

### Article focus

- While opioids and opioid substitution therapies themselves are not known to be carcinogenic, opioid dependence is associated with exposure to a number of carcinogenic agents, including infection by the blood-borne viruses hepatitis B, hepatitis C, and HIV.
- The risk of cancer in opioid dependence has been examined in two studies with insufficient power to address risk for all cancer types.
- There is no prior evidence on the association between blood-borne virus infection and cancer risk in people who are opioid dependent.

### Key messages

- People who are opioid dependent have an excess risk of a range of cancers compared with the general population.
- The excess cancer risk is predominantly restricted to those with blood-borne virus infection.
- Cancer incidence rates have increased dramatically over time, supporting use of the opioid substitution therapy setting to opportunistically implement targeted cancer prevention strategies.

### Strengths and limitations

- The study is based on a large population-based cohort with infections and outcomes obtained from population-based registries.
- Misclassification of infection by blood-borne viruses is possible because not all OST recipients will have been routinely tested.
- Data on smoking, alcohol use, blood-borne virus treatment and vaccination are not available.

**ABSTRACT**

**Objective** To quantify cancer risk in opioid dependence and the association with infection by the oncogenic blood-borne viruses (BBVs) hepatitis C (HCV), hepatitis B (HBV), and HIV.

**Design** Cohort study.

**Setting** New South Wales, Australia.

**Participants** 45 412 adults aged 16 years or over registered for opioid substitution therapy (OST) between 1985 and 2007. Notifications of cancer, death, and infection with HCV, HBV, and HIV were ascertained by record linkage with registries.

**Main outcome measures** The ratios of observed to expected number of cancers, standardised incidence ratios (SIRs), and the average annual percent change (AAPC) in overall age and sex-standardised cancer incidence.

**Results** Overall cancer risk was modestly increased compared to the general population (SIR 1.15, 95% CI 1.07 to 1.23). Excess risk was observed for 11 cancers, particularly lung (4.02, 95% CI 3.32 to 4.82), non-Hodgkin lymphoma (1.51, 95% CI 1.20 to 1.88), and liver (8.04, 95% CI 6.18 to 10.3). Reduced risk was observed for six cancers, including prostate (0.16, 95% CI 0.06 to 0.32) and breast (0.48, 95% CI 0.35 to 0.62). Individuals notified with HCV or HBV had a markedly increased risk of liver cancer; lung cancer risk was also increased in those with HCV. HIV was associated with an elevated risk of liver, anus, and kidney cancer, non-Hodgkin lymphoma and Kaposi sarcoma. Cancer risk was not increased in individuals without a BBV notification, apart from pancreatic cancer (3.92, 95% CI 1.07 to 10.0). Cancer incidence increased significantly over time (AAPC 9.4%, 4.2 to 15%,  $p=0.001$ ).

**Conclusions** BBVs play a major role in the cancer risk profile of opioid-dependent individuals registered for OST. To address the dramatic increasing trend in cancer incidence, the OST setting could be utilised for cancer prevention strategies.

## INTRODUCTION

Opioid-dependent individuals are exposed to a multitude of carcinogens. People who inject drugs are more likely to have hepatitis C (HCV), hepatitis B (HBV) or human immunodeficiency virus (HIV).<sup>1</sup> Tobacco-smoking and hazardous alcohol use are extremely common,<sup>2</sup> as are risky sexual practices, resulting in high rates of infection with human papillomavirus (HPV).<sup>3</sup> Although it is an effective treatment for heroin and other opioid dependence,<sup>4</sup> opioid substitution therapy (OST) use is typically cyclic,<sup>5</sup> with relapse to drug injection a common occurrence.

In Australia, the long-standing and widespread availability of OST and public health initiatives such as needle and syringe programmes (NSPs) have extended the life expectancy of opioid-dependent people.<sup>4,6</sup> In injecting drug users, the prevalence of HIV is low (<1% in heterosexuals), whereas the prevalence of hepatitis C is high (50-60%).<sup>7</sup> However one of the consequences of the increased longevity of opioid-dependent people is the attendant risk of age-related health conditions, including cancer.<sup>8</sup> The OST agents themselves are not considered risk factors for cancer as murine studies indicate they are not carcinogenic.<sup>9,10</sup>

Despite evidence of exposure to multiple cancer risk factors and the public health impact that this may have upon ageing cohorts of opioid-dependent people, there has been no population-based study of the spectrum of cancer risk in this group and no study of this risk in relation to blood-borne virus (BBV) infection. We examined these associations among 45 412 people who entered OST in New South Wales (NSW), Australia over a 23-year period, considering 1) overall and site-specific cancer incidence, 2) the cancer risk profiles of those infected with HCV, HBV, and HIV, and 3) trends in cancer incidence over time.



## METHODS

### Study population

We conducted a cohort study using record linkage between existing population-based health datasets. The study population comprised individuals registered on the Pharmaceutical Drugs of Addiction System, a record of all NSW Health Department authorities that administer methadone or buprenorphine to opioid-dependent people. Included were all adults ( $\geq 16$  years) registered for OST between 1st January 1985, the date of inception of the system, and 31st December 2007, the latest date for which cancer diagnoses were available ( $n=45\,483$ ). Individuals were excluded from the cohort if information essential for record linkage was incomplete ( $n=10$ , 0.02%) or if the OST end date preceded the start date ( $n=61$ , 0.13%). Registrants diagnosed with cancer prior to commencing OST ( $n=183$ , 0.40%) were not excluded; however they did not contribute time at risk for that cancer.

HBV and HCV notification data were available for NSW residents only from 1993. Therefore our analyses of cancer risk in those with hepatitis notifications and those with no BBVs (no HCV, HBV, or HIV notification) were restricted to a sub-cohort of individuals registered for OST from 1st January 1993 ( $n=32\,075$ ). To limit the potential for under-ascertainment of hepatitis notifications, interstate OST registrants ( $n=2\,462$ , 7.68%) were excluded and other OST registrants were censored when they moved interstate OST ( $n=2\,297$ , 7.76%).

### Data collection

In Australia, all deaths, newly diagnosed cancers (excluding basal and squamous cell carcinoma of the skin), and HCV, HBV, and HIV infections must be reported to government agencies by statute. Dates of death in OST registrants were ascertained by linkage with the National Death Index (1980–2007). The date of diagnosis, topography and morphology of

1  
2  
3 incident cancers were identified by linkage with the Australian Cancer Database, a register of  
4  
5 incident primary invasive neoplasms (1982–2007). Solid cancers were classified according to  
6  
7 the International Classification of Diseases (ICD), 10th revision while haematopoietic  
8  
9 neoplasms and Kaposi sarcomas were classified according to the ICD for Oncology, 3rd  
10  
11 edition. Dates of HIV and acquired immunodeficiency syndrome (AIDS) notifications were  
12  
13 ascertained by linkage with the National HIV Database (1985–2007) and the National AIDS  
14  
15 Register (1982–2007), respectively. Linkage with the NSW Health Notifiable Conditions  
16  
17 Information Management System (1993–2007) identified dates of HBV and HCV  
18  
19 notifications for the sub-cohort, based on detection of HBV surface antigen or HBV DNA  
20  
21 and anti-HCV antibody or HCV RNA, respectively.  
22  
23  
24  
25  
26

27 The name, sex, date of birth, date of death, and state of residence of registrants were used for  
28  
29 record linkage. All linkages used probabilistic matching techniques except the HIV/AIDS  
30  
31 linkage which used deterministic methods because only the first two letters of the given name  
32  
33 and surname, not full name, were recorded on these registers.  
34  
35  
36  
37

38 Cancer incidence rates for the Australian population were obtained from the Australian  
39  
40 Cancer Database by five-year age group, sex, calendar year, and state/territory, for 1985 to  
41  
42 2007.  
43  
44  
45  
46

### 47 **Data analysis**

#### 48 **Cancer incidence**

49  
50 Person-years of follow-up accumulated from the date of first OST registration and terminated  
51  
52 at the first occurrence of cancer diagnosis, death, age 80, interstate transfer (for BBV  
53  
54 analyses only), or 31st December 2007.  
55  
56  
57  
58  
59  
60

1  
2  
3  
4  
5 Crude and age/sex-standardised cancer incidence rates, standardised to the 1996 Australian  
6 population, and Poisson 95% confidence intervals (CIs) were calculated using annual  
7 Australian population estimates from the Australian Bureau of Statistics. To describe overall  
8 cancer incidence trends over time the average annual per cent change (AAPC) was estimated  
9 using Poisson regression.<sup>11</sup>  
10  
11  
12  
13  
14  
15  
16  
17

### 18 Relative risk of cancer

19  
20 Risk of cancer overall and for each cancer type were examined in the full cohort (1985–2007)  
21 and the sub-cohort (1993–2007) using the standardised incidence ratio (SIR), the ratio of the  
22 observed and the expected numbers of cancers. The expected numbers of incident cancers  
23 were calculated by multiplying cohort person-years at risk by five-year age-, sex-, state-, and  
24 calendar year-specific population cancer incidence rates. The exception was Kaposi sarcoma,  
25 where 1982 population rates were used to avoid the impact of AIDS on the incidence of this  
26 cancer. The SIRs were computed for cancer overall and for the most frequently occurring  
27 cancers by sex and age at follow-up (<40, 40–49, ≥50years). In addition, SIRs were  
28 calculated by BBV notification status; HIV with or without HBV or HCV; HBV  
29 monoinfection; HCV monoinfection; HBV/HCV co-infection; and HBV/HCV/HIV  
30 uninfected. BBV infection was examined in a time-dependent manner, accounting for change  
31 in notification status over time.  
32  
33  
34  
35  
36  
37  
38  
39  
40  
41  
42  
43  
44  
45  
46  
47  
48

49 For registrants with an AIDS notification only or an HIV notification occurring less than five  
50 years before the AIDS notification (n=59, 0.13%), the date of HIV infection was backdated to  
51 five years prior to the AIDS notification or to the date of cohort entry, whichever occurred  
52 later, to more accurately estimate the date of HIV infection. The resultant retrospectively  
53  
54  
55  
56  
57  
58  
59  
60

1  
2  
3 defined person-years were survival-adjusted by applying period-specific, all-age, sex-, and  
4  
5 site-specific cancer survival rates to account for those individuals with HIV infection who  
6  
7 may have developed cancer and subsequently died before being diagnosed with HIV.<sup>12</sup> A  
8  
9 similar adjustment was performed as a sensitivity analysis for liver cancer risk in those  
10  
11 notified with HCV, assuming a median age at infection of 25 years for injecting drug user  
12  
13 (IDU)-acquired infection<sup>13</sup> and backdating HCV infection up to 15 years.  
14  
15

16  
17  
18 We compared patterns of cancer risk for the BBV subgroups but could not compare SIRs  
19  
20 statistically because of the heterogeneity in subgroup age and sex distributions.<sup>14</sup>  
21  
22

23  
24  
25 Within-cohort risk factors were examined for the most frequently occurring cancers in the  
26  
27 sub-cohort (1993–2007); liver, lung, and non-Hodgkin lymphoma. Sex and the time-  
28  
29 dependent factors—current age, calendar year, and HBV, HCV, and HIV notification—were  
30  
31 *a priori* included in all multivariable models. Poisson regression was used to determine  
32  
33 incidence rate ratios (IRRs) with 95% CIs.  
34  
35

36  
37  
38 Analyses were performed using SAS<sup>®</sup> software v9.2 (SAS Institute Inc., Cary, NC, USA) and  
39  
40 Joinpoint Regression Program, v3.5 (Statistical Methodology and Applications Branch and  
41  
42 Data Modeling Branch, Surveillance Research Program, National Cancer Institute). Person-  
43  
44 years were calculated using the *%stratify* macro.<sup>15</sup>  
45  
46  
47  
48  
49  
50  
51

## 52 RESULTS

53  
54 After applying exclusion criteria, 45 412 individuals registered for OST between 1985 and  
55  
56 2007 were included in the study cohort (Table 1a). This cohort accumulated 481 936 person-  
57  
58  
59  
60

1  
2  
3 years of follow-up for cancer, a median of 9.9 person-years per registrant (interquartile range  
4 [IQR] 5.61 to 15.2; Table 1a). Two-thirds of the cohort was male. The median age at OST  
5 registration was 27 years and the median cumulative time on OST was 2.6 years (IQR 0.6 to  
6 6.5). A total of 423 (0.8%) registrants were notified with a HIV/AIDS diagnosis prior to or  
7 after OST registration.  
8  
9

10  
11  
12  
13  
14  
15  
16 We observed 819 (1.8%) incident primary cancers (803 first, 16 second cancers) after OST  
17 registration and the median age at diagnosis of first cancer was 43 (IQR 37 to 49) years.  
18  
19

20  
21  
22  
23 After applying further exclusion criteria, the sub-cohort with assessable hepatitis data  
24 comprised 29 613 participants entering OST between 1993 and 2007 (Table 1b). They were  
25 of similar age and sex as the full cohort (median age at OST registration, 26 years; 69%  
26 male). A total of 14 892 (50%) registrants were notified with HCV alone, 598 (2%) with  
27 HBV alone, and 898 (3%) with HBV and HCV. Over the 213 008 person-years of follow-up  
28 in the sub-cohort, 240 (0.8%) incident cancers were observed.  
29  
30  
31  
32  
33  
34  
35  
36  
37  
38

### 39 **Cancer incidence**

40  
41 For the period 1985 to 2007 the crude cancer incidence rate was 170 per 100 000 person-  
42 years (95% CI 159 to 182). The age-standardised rate was 349 per 100 000 person-years  
43 (95% CI 337 to 361) and the annual age-standardised rate increased significantly between  
44 1985 and 2007 (AAPC=9.4%, 95% CI 4.2 to 15%; p=0.001).  
45  
46  
47  
48  
49  
50

### 51 **Cancer risk**

52  
53 Risk of cancer overall was slightly higher in OST registrants compared to the Australian  
54 population (SIR=1.15, 95% CI 1.07 to 1.23). SIRs were significantly greater than unity for  
55  
56  
57  
58  
59  
60

1  
2  
3 cancers of the tonsil, anus and anal canal, liver, pancreas, larynx, trachea bronchus and lung,  
4  
5 vulva and cervix, Kaposi sarcoma, non-Hodgkin lymphoma and cancer of unknown primary  
6  
7 site (Figure 1). Conversely, SIRs were significantly less than unity for melanoma and cancers  
8  
9 of the colorectum, breast, prostate, brain and central nervous system and thyroid.  
10

11  
12  
13  
14 Risk of any cancer was significantly increased in men and in those more than 40 years of age  
15  
16 (Table 2). Liver and lung cancer risk was increased in men and women; liver cancer risk was  
17  
18 significantly increased only for those more than 40 years of age, while lung cancer risk was  
19  
20 increased regardless of attained age. Similarly, women of all ages experienced half the risk of  
21  
22 breast cancer.  
23

#### 24 25 26 27 28 **Blood-borne viruses and cancer risk**

29  
30 Thirty-four cancers were observed in registrants notified with HIV (irrespective of infection  
31  
32 with other BBVs), with an SIR of 6.68 (95% CI 4.63 to 9.34; Figure 2). SIRs were  
33  
34 significantly greater than unity for several cancers, including Kaposi sarcoma, non-Hodgkin  
35  
36 lymphoma, and anal cancer.  
37

38  
39  
40  
41 In those notified with HCV monoinfection, the overall risk of cancer was not significantly  
42  
43 different from that of the general population (SIR=1.06, 95% CI 0.89 to 1.25; Figure 3) but  
44  
45 the SIR for liver cancer was 6.61 (95% CI 3.02 to 12.5). After adjusting for an assumed age  
46  
47 of HCV infection of 25 years and for survival, the SIR for liver cancer increased to 13.1  
48  
49 (95% CI 6.00 to 24.9). Risk of lung cancer and mouth cancer were also elevated. On the other  
50  
51 hand, breast cancer risk was decreased and while six prostate cancers were expected, none  
52  
53 were observed. Few cancers were observed in those notified with HBV (one case) or HBV-  
54  
55  
56  
57  
58  
59  
60

1  
2  
3 HCV co-infection (18 cases). The risk of liver cancer in individuals notified with HBV-HCV  
4  
5 co-infection was markedly elevated (SIR=35.9, 95% CI 7.41 to 105).  
6  
7

8  
9  
10 Registrants without a notification of BBV infection were at decreased risk of cancer overall  
11 (SIR=0.68, 95% CI 0.54 to 0.84; Figure 3) and melanoma. In this subgroup, no infection-  
12  
13 related cancers occurred at rates significantly different to the general population; however the  
14  
15 risk of pancreatic cancer was significantly elevated.  
16  
17

18  
19  
20 In multivariable analyses adjusting for age, calendar year, sex and HCV, HBV, and HIV  
21 notification status, age was an independent risk factor for the most frequently occurring  
22  
23 cancers (Table 3). Notification of HBV and HCV infection predicted risk of liver cancer, and  
24  
25 notification of HIV infection predicted risk of non-Hodgkin lymphoma. Notification of HCV  
26  
27 infection independently predicted risk of lung cancer.  
28  
29  
30  
31

## 32 33 34 **DISCUSSION**

35  
36 We found that cancer risk in opioid-dependent people registered for OST was significantly  
37  
38 increased for a number of cancers causally related to infection with oncogenic viruses,  
39  
40 smoking, and alcohol consumption. The excess cancer risk was almost entirely restricted to  
41  
42 those notified with a BBV infection, except for pancreatic cancer. The most common cancers  
43  
44 for which there was an excess risk were independently associated with increasing age and  
45  
46 infection by one or more BBVs; liver cancer (HCV, HBV), lung cancer (HCV), and non-  
47  
48 Hodgkin lymphoma (HIV). Cancer incidence also increased significantly over time,  
49  
50 highlighting cancer as an emerging public health concern for this population.  
51  
52  
53

### 54 55 56 **Strengths and weaknesses**

57  
58  
59  
60

1  
2  
3 The strengths of this study include the large population size and the lengthy follow-up, which  
4 provided the statistical power to improve upon sparse knowledge of the cancer risk faced by  
5 the opioid dependent population. Additionally, use of national, population-based registers for  
6 ascertainment of cancer diagnoses, HIV/AIDS diagnoses, and deaths enabled unbiased and  
7 comprehensive follow-up of the cohort. On the other hand, although routine testing for BBV  
8 infection is recommended, it is likely that not all OST recipients were routinely tested, and  
9 use of the notification date in analysis underestimates the timing of the infection. We also  
10 lacked data on BBV treatment and HBV vaccination. Furthermore, it was not possible to  
11 determine serological clearance of HCV. Thus it is possible that we have misclassification  
12 with respect to BBV infection, meaning that we have under-estimated the association of  
13 chronic HCV infection with cancer in OST registrants.  
14  
15  
16  
17  
18  
19  
20  
21  
22  
23  
24  
25  
26  
27  
28

29  
30 In addition, this study was retrospective, relying upon linkage with routinely collected  
31 administrative data, and some false positive and negative linkages do occur. Nevertheless,  
32 quality assurance practices performed by the data linkage units can result in high sensitivity  
33 and specificity (e.g. hepatitis linkage sensitivity >99.9%, specificity 99.8%).<sup>16</sup> The lack of  
34 data on smoking and alcohol use of the OST recipients meant that we could not examine the  
35 contribution by these agents to the excess risk of liver and lung cancer in those with BBV  
36 infection. Given it is likely that around 50% of Australians with opioid dependence enter  
37 OST at some point,<sup>17</sup> our findings are likely to be generalisable to the broader opioid  
38 dependent population. Our cohort being a representative sample is supported by the similarity  
39 of BBV prevalence with NSP survey results.<sup>7</sup> With respect to other OST populations, our  
40 data may represent a conservative estimate of the public health burden given the markedly  
41 lower incidence of HIV infection in comparison to most other countries.<sup>18</sup>  
42  
43  
44  
45  
46  
47  
48  
49  
50  
51  
52  
53  
54  
55  
56  
57  
58  
59  
60



## Context

This is the first population-based study of cancer incidence among people who are opioid dependent, and the first study to examine cancer incidence in relation to BBV infection. Of the two prior studies measuring cancer incidence in opioid dependent individuals, one had very limited statistical power and examined a US cohort of mostly Hispanic injecting drug users with a high prevalence of HIV,<sup>19</sup> while the other studied Israeli OST recipients but did not link with a population-based death registry and examined risk for only eight cancer types.<sup>20</sup>

## Explanations

Apart from Kaposi sarcoma, the strongest excess cancer risk in those registered for OST was observed for liver cancer. Stratification by BBV notification and within-cohort risk factor analyses showed that this excess risk occurred only in those with BBV infection, especially HCV alone or HCV/HBV co-infection. Surveillance bias did not strongly affect our risk estimates, as only one liver cancer was diagnosed within six months of commencing OST. Lung cancer risk was elevated in the cohort overall and in the subgroup with HCV. Whilst HCV notification independently predicted lung cancer risk, there is no evidence of a biological link and this result may indicate those with HCV smoke more heavily than those without HCV. Tobacco exposure may also explain the excess risk of mouth cancer in this subgroup. The excess risk of liver<sup>20</sup> and lung<sup>19,20</sup> cancer is consistent with prior evidence.

An excess risk of Kaposi sarcoma, non-Hodgkin lymphoma, and anal cancer was observed in OST registrants overall, particularly those with HIV. These cancers have an established causal association with HIV-related immunosuppression and are likely to result from impaired immune surveillance in people with infection by Kaposi sarcoma-associated

1  
2  
3 herpesvirus, Epstein-Barr virus, and HPV, respectively.<sup>21</sup> An excess risk of five non-AIDS-  
4  
5 defining malignancies was also observed, supporting evidence that these cancers are  
6  
7 becoming increasingly important for those with HIV infection.<sup>22</sup>  
8  
9

10  
11 A number of cancers occurred at rates significantly lower than in the matched general  
12  
13 population. For melanoma, two explanations are suggested. Firstly, Aboriginal Australians,  
14  
15 who experience one-tenth the risk of melanoma compared to non-Aboriginal Australians, are  
16  
17 over-represented in the OST population compared to the general population (11% vs. 1.5–  
18  
19 2.0%).<sup>23</sup> Secondly, 69% of a recent sample (n=154) of active IDUs in NSW reported a  
20  
21 history of incarceration,<sup>17</sup> which limits sun exposure, an established risk factor for melanoma.  
22  
23 Under-participation in population-based and other cancer screening programs may explain  
24  
25 the reduced risk of breast, colorectal and prostate cancer in OST recipients. However, only  
26  
27 4% of the total follow-up time was contributed by individuals who were age-eligible for these  
28  
29 programs, substantially weakening the case for attenuation in risk due to under-participation  
30  
31 in screening. A reduced risk of colorectal and breast cancer was observed in Israeli OST  
32  
33 recipients,<sup>20</sup> and there is some evidence that opioid use may impart a decreased risk of certain  
34  
35 cancers. For example, a side-effect of chronic opioid use is hypogonadism, resulting in low  
36  
37 oestrogen (women) and testosterone (men).<sup>24</sup> Low levels of these hormones may decrease  
38  
39 premenopausal breast cancer and prostate cancer risk, however the evidence is  
40  
41 inconclusive.<sup>25, 26</sup> Characteristics common to OST registrants, high parity and early age at  
42  
43 first pregnancy,<sup>17, 27</sup> both considered protective for breast cancer,<sup>28</sup> as well as reduced  
44  
45 prevalence of overweight and obesity,<sup>29</sup> may also contribute to the observed risk reduction.  
46  
47  
48  
49  
50  
51  
52  
53  
54  
55  
56  
57  
58  
59  
60

## Implications

The observed cancer risk profile strongly supports the implementation of targeted cancer prevention strategies in the OST setting. Given the concentration of excess risk among those with BBV notifications, and the high prevalence of HCV among this population, there is a clear need for interventions that reduce HCV incidence<sup>4</sup> and that treat people who have developed chronic infections.<sup>1</sup> NSPs are highly effective at reducing the rate of acquisition of BBVs.<sup>4</sup> Antiviral treatments for HCV and HBV infection induce regression of fibrosis and decrease liver cancer risk.<sup>30</sup> People with a history of injecting drug use respond positively to HCV therapies, with acceptable levels of sustained virological response<sup>31</sup> and antiviral therapy is also not contraindicated in people with HIV receiving OST. The issue, however, is one of coverage. Many physicians remain unwilling to provide such treatments to people who use illicit drugs in the face of evidence that they have similar levels of adherence to treatment as other patient groups.<sup>32</sup> Thus, despite HCV being one of the strongest risk factors for cancer in OST, very few people in OST have received treatment to address this risk.<sup>1</sup>

As the risks for cancers with established causal links to tobacco-smoking and alcohol use were elevated, namely lung, larynx, and pancreatic cancer (smoking), and liver, oral, larynx, and oesophageal cancer (alcohol), a reduction in these behaviours would similarly mitigate cancer risk. OST clients show strong interest in smoking cessation programs,<sup>33</sup> and they do not adversely impact OST,<sup>34</sup> but again few are offered such treatments in routine healthcare settings. The excess risk of cancer of the cervix, vulva and anus, cancers caused by chronic infection with HPV, may be reduced by safer sexual practices. The increased risk of cervical cancer also supports the need for greater participation in cervical screening.

**Conclusions**

Opioid-dependent people registered for OST face an excess risk of a variety of cancers compared to the general population, in particular cancers associated with infection by BBVs. The implementation of harm reduction strategies in the OST setting represents an evidently underutilised opportunity to respond to the escalating cancer burden facing this marginalised population.

For peer review only

1  
2  
3 **LIST OF FIGURE LEGENDS**  
4

5 **Figure 1** Risk of cancer among NSW opioid substitution therapy registrants, 1985–2007  
6

7  
8 Key  
9

10 Obs=observed number of cancers. Exp=expected number of cancers. SIR=standardised  
11 incidence ratio. CI=confidence interval. CNS=central nervous system.  
12

13  
14  
15 \*Includes non-Hodgkin lymphoma not otherwise specified (International Classification of  
16 Diseases for Oncology, 3rd edition: 9590).  
17

18  
19  
20 Non-melanoma skin cancer excludes diagnoses of basal cell and squamous cell carcinoma.  
21  
22  
23  
24

25  
26 **Figure 2** Risk of cancer in NSW opioid substitution therapy registrants with notified HIV  
27 infection, 1985–2007  
28

29  
30 Key  
31

32 Obs=observed number of cancers. Exp=expected number of cancers. SIR=standardised  
33 incidence ratio. CI=confidence interval.  
34  
35

36  
37  
38 \*Includes non-Hodgkin lymphoma not otherwise specified (International Classification of  
39 Diseases for Oncology, 3rd edition: 9590).  
40  
41  
42  
43  
44  
45

46 **Figure 3** Risk of cancer among NSW opioid substitution therapy registrants with notified  
47 hepatitis C infection and registrants without notified hepatitis B, hepatitis C or HIV infection,  
48 1993–2007  
49  
50

51 Key  
52  
53  
54  
55  
56  
57  
58  
59  
60

1  
2  
3  
4  
5  
6  
7  
8  
9  
10  
11  
12  
13  
14  
15  
16  
17  
18  
19  
20  
21  
22  
23  
24  
25  
26  
27  
28  
29  
30  
31  
32  
33  
34  
35  
36  
37  
38  
39  
40  
41  
42  
43  
44  
45  
46  
47  
48  
49  
50  
51  
52  
53  
54  
55  
56  
57  
58  
59  
60

\*Includes non-Hodgkin lymphoma not otherwise specified (International Classification of Diseases for Oncology, 3rd edition: 9590)

†SIRs not estimated for cancers with less than 3 observed cases

For peer review only

**Table 1a** Characteristics of all NSW opioid substitution therapy registrants and those with notified HIV infection, 1985–2007

|                                    | Entire cohort          |              |                  | HIV infection          |              |                  |
|------------------------------------|------------------------|--------------|------------------|------------------------|--------------|------------------|
|                                    | No. (%) of registrants | Person-years |                  | No. (%) of registrants | Person-years |                  |
|                                    |                        | Total        | Median (IQR)     |                        | Total        | Median (IQR)     |
| <b>Total</b>                       | 45 412 (100)           | 481 936      | 9.94 (5.61–15.2) | 426 (100)              | 3511         | 7.60 (3.66–12.4) |
| <b>Sex</b>                         |                        |              |                  |                        |              |                  |
| Men                                | 30 147 (66.4)          | 310 632      | 9.67 (5.31–14.8) | 346 (81.2)             | 2796         | 7.58 (3.63–11.8) |
| Women                              | 15 265 (33.6)          | 171 304      | 10.6 (6.30–16.2) | 80 (18.8)              | 715          | 7.68 (3.72–14.6) |
| <b>Age at cohort entry (years)</b> |                        |              |                  |                        |              |                  |
| <25                                | 16 266 (35.8)          | 166 503      | 9.48 (5.83–14.0) | 139 (32.6)             | 1176         | 7.38 (3.87–13.0) |
| 25–30                              | 14 680 (32.3)          | 171 073      | 11.3 (6.26–17.4) | 120 (28.2)             | 1027         | 7.96 (3.75–11.7) |
| ≥31                                | 14 466 (31.9)          | 144 361      | 9.46 (4.86–14.4) | 167 (39.2)             | 1308         | 7.25 (2.83–12.7) |
| <b>Year of cohort entry</b>        |                        |              |                  |                        |              |                  |
| 1985–1989                          | 8476 (18.7)            | 161 566      | 20.4 (18.7–21.8) | 75 (17.6)              | 887          | 10.2 (6.02–19.2) |
| 1990–1995                          | 11 220 (24.7)          | 152 938      | 14.1 (12.7–15.7) | 140 (32.9)             | 1479         | 12.8 (5.99–14.8) |
| 1996–2001                          | 15 302 (33.7)          | 133 232      | 8.84 (7.35–10.4) | 122 (28.6)             | 908          | 8.00 (6.33–9.65) |
| 2002–2007                          | 10 414 (22.9)          | 34 200       | 3.44 (1.88–4.81) | 89 (20.9)              | 237          | 2.72 (1.22–3.89) |

1  
2  
3  
4  
5  
6  
7  
8  
9  
10  
11  
12  
13  
14  
15  
16  
17  
18  
19  
20  
21  
22  
23  
24  
25  
26  
27  
28  
29  
30  
31  
32  
33  
34  
35  
36  
37  
38  
39  
40  
41  
42  
43  
44  
45  
46  
47  
48  
49**Table 1b** Characteristics of NSW opioid substitution therapy registrants, by BBV notification status, 1993–2007

|                                    | Entire sub-cohort       |              | No BBV infection |                        | HBV mono-infection |        | HCV mono-infection     |              | HBV/HCV co-infection |                        | HIV infection <sup>†</sup> |        |            |      |      |            |      |      |
|------------------------------------|-------------------------|--------------|------------------|------------------------|--------------------|--------|------------------------|--------------|----------------------|------------------------|----------------------------|--------|------------|------|------|------------|------|------|
|                                    | No. (%) of registrants* | Person-years |                  | No. (%) of registrants | Person-years       |        | No. (%) of registrants | Person-years |                      | No. (%) of registrants | Person-years               |        |            |      |      |            |      |      |
|                                    |                         | Total        | Median           |                        | Total              | Median |                        | Total        | Median               |                        | Total                      | Median |            |      |      |            |      |      |
| <b>Total</b>                       | 29 613 (100)            | 213 008      | 7.28             | 23 650 (100)           | 109 313            | 3.53   | 598 (100)              | 2608         | 3.56                 | 14 892 (100)           | 94 331                     | 6.36   | 898 (100)  | 5249 | 6.02 | 234 (100)  | 1504 | 6.20 |
| <b>Sex</b>                         |                         |              |                  |                        |                    |        |                        |              |                      |                        |                            |        |            |      |      |            |      |      |
| Men                                | 20 348 (68.7)           | 144 932      | 7.19             | 16 352 (69.1)          | 76 495             | 3.64   | 436 (72.9)             | 1918         | 3.60                 | 9793 (65.8)            | 61 378                     | 6.29   | 643 (71.6) | 3782 | 6.10 | 204 (87.2) | 1355 | 6.55 |
| Women                              | 9265 (31.3)             | 68 076       | 7.51             | 7298 (30.9)            | 32 818             | 3.25   | 162 (27.1)             | 691          | 3.50                 | 5099 (34.2)            | 32 953                     | 6.47   | 255 (28.4) | 1466 | 5.94 | 30 (12.8)  | 148  | 4.35 |
| <b>Age at cohort entry (years)</b> |                         |              |                  |                        |                    |        |                        |              |                      |                        |                            |        |            |      |      |            |      |      |
| 15–25                              | 11 674 (39.4)           | 87 088       | 7.60             | 9915 (41.9)            | 47 340             | 3.81   | 278 (46.5)             | 1282         | 3.96                 | 5706 (38.3)            | 35 963                     | 6.41   | 351 (39.1) | 2130 | 6.27 | 61 (26.1)  | 373  | 6.08 |
| 25–30                              | 8427 (28.5)             | 60 907       | 7.32             | 6771 (28.6)            | 31 905             | 3.56   | 169 (28.3)             | 770          | 3.18                 | 4106 (27.6)            | 26 201                     | 6.42   | 266 (29.6) | 1534 | 5.79 | 68 (29.1)  | 494  | 7.73 |
| 31–40                              | 9512 (32.1)             | 65 013       | 6.74             | 6964 (29.4)            | 30 068             | 3.06   | 151 (25.3)             | 555          | 3.39                 | 5080 (34.1)            | 32 167                     | 6.23   | 281 (31.3) | 1584 | 5.71 | 105 (44.9) | 637  | 5.17 |
| <b>Year of cohort entry</b>        |                         |              |                  |                        |                    |        |                        |              |                      |                        |                            |        |            |      |      |            |      |      |
| 1993–1997                          | 10 212 (34.5)           | 111 454      | 11.7             | 8944 (37.8)            | 54 619             | 4.76   | 158 (26.4)             | 981          | 5.08                 | 3563 (23.9)            | 36 132                     | 11.2   | 129 (14.4) | 1298 | 10.9 | 84 (35.9)  | 754  | 10.7 |
| 1998–2002                          | 11 655 (39.4)           | 81 399       | 7.36             | 8962 (37.9)            | 42 095             | 5.35   | 290 (48.5)             | 1304         | 5.12                 | 6958 (46.7)            | 47 049                     | 7.05   | 475 (52.9) | 3167 | 6.80 | 82 (35.0)  | 573  | 7.55 |
| 2003–2007                          | 7746 (26.2)             | 20 155       | 2.70             | 5744 (24.3)            | 12 599             | 2.11   | 150 (25.1)             | 323          | 2.01                 | 4371 (29.4)            | 11 150                     | 2.55   | 294 (32.7) | 784  | 2.75 | 68 (29.1)  | 177  | 2.71 |

\*Category numbers will not sum to total numbers for the sub-cohort as individuals were followed-up in a time-dependent manner, allowing an individual to contribute person-years to multiple groups as their BBV notification status changed over the period of observation.

†With or without HBV or HCV notification.



**Table 2** Risk of any cancer and the most frequently occurring cancers in NSW opioid substitution therapy registrants, by sex and current age (1985–2007)

| Cancer type                        | Obs. | Exp. | SIR  | 95% CI    |
|------------------------------------|------|------|------|-----------|
| <b>All cancer</b>                  |      |      |      |           |
| Men                                | 536  | 431  | 1.24 | 1.14–1.35 |
| Women                              | 283  | 285  | 0.99 | 0.88–1.11 |
| <40 yrs                            | 282  | 295  | 0.96 | 0.85–1.07 |
| 40–49 yrs                          | 357  | 282  | 1.27 | 1.14–1.40 |
| ≥50 yrs                            | 180  | 139  | 1.30 | 1.12–1.50 |
| <b>Liver</b>                       |      |      |      |           |
| Men                                | 51   | 6.92 | 7.37 | 5.49–9.69 |
| Women                              | 12   | 0.91 | 13.2 | 6.80–23.0 |
| <40 yrs                            | 4    | 1.62 | 2.47 | 0.67–6.33 |
| 40–49 yrs                          | 26   | 3.96 | 6.57 | 4.29–9.63 |
| ≥50 yrs                            | 33   | 2.26 | 14.6 | 10.1–20.6 |
| <b>Trachea, bronchus, and lung</b> |      |      |      |           |
| Men                                | 82   | 19.8 | 4.15 | 3.32–5.11 |
| Women                              | 28   | 7.59 | 3.69 | 2.45–5.33 |
| <40 yrs                            | 15   | 4.11 | 3.65 | 2.04–6.02 |
| 40–49 yrs                          | 58   | 13.0 | 4.46 | 3.41–5.71 |
| ≥50 yrs                            | 37   | 10.2 | 3.61 | 2.57–4.90 |
| <b>Melanoma</b>                    |      |      |      |           |
| Men                                | 64   | 91.2 | 0.70 | 0.54–0.89 |
| Women                              | 37   | 48.7 | 0.76 | 0.54–1.03 |
| <40 yrs                            | 48   | 71.6 | 0.67 | 0.50–0.88 |
| 40–49 yrs                          | 37   | 51.4 | 0.72 | 0.51–0.98 |
| ≥50 yrs                            | 16   | 16.9 | 0.95 | 0.56–1.49 |
| <b>Female breast</b>               |      |      |      |           |
| <40 yrs                            | 15   | 32.5 | 0.46 | 0.27–0.74 |
| 40–49 yrs                          | 27   | 54.3 | 0.48 | 0.32–0.69 |
| ≥50 yrs                            | 6    | 14.1 | 0.43 | 0.17–0.86 |
| <b>Cervical</b>                    |      |      |      |           |
| <40 yrs                            | 21   | 11.0 | 1.90 | 1.20–2.84 |
| 40–49 yrs                          | 14   | 4.67 | 3.00 | 1.64–5.03 |
| ≥50 yrs                            | 2    | 0.63 | 3.19 | 0.39–11.5 |
| <b>Non-Hodgkin lymphoma</b>        |      |      |      |           |
| Men                                | 62   | 38.1 | 1.63 | 1.26–2.07 |
| Women                              | 13   | 11.5 | 1.13 | 0.62–1.86 |
| <40 yrs                            | 25   | 20.9 | 1.20 | 0.79–1.73 |
| 40–49 yrs                          | 37   | 19.8 | 1.87 | 1.33–2.54 |
| ≥50 yrs                            | 13   | 8.94 | 1.46 | 0.78–2.49 |

Obs=observed number of cancers. Exp=expected number of cancers. SIR=standardised incidence ratio. CI=confidence interval.

**Table 3** Multivariable analysis of risk factors for common cancers among NSW opioid substitution therapy registrants, 1993-2007

|                                     | Lung Cancer |      |           |         | Non-Hodgkin lymphoma |      |           |         | Liver Cancer |      |           |         |
|-------------------------------------|-------------|------|-----------|---------|----------------------|------|-----------|---------|--------------|------|-----------|---------|
|                                     | n           | IRR* | 95%CI     | P       | n                    | IRR* | 95%CI     | P       | n            | IRR* | 95%CI     | P       |
| Current age <sup>†</sup>            | 27          | 1.19 | 1.15–1.24 | <0.0001 | 23                   | 1.06 | 1.01–1.11 | 0.025   | 13           | 1.20 | 1.13–1.27 | <0.0001 |
| Calendar year <sup>†</sup>          | 27          | 0.91 | 0.81–1.03 | 0.131   | 23                   | 1.16 | 1.01–1.37 | 0.054   | 13           | 1.13 | 0.91–1.49 | 0.317   |
| Sex                                 |             |      |           |         |                      |      |           |         |              |      |           |         |
| Men                                 | 22          | 1.55 | 0.63–4.65 | 0.378   | 17                   | 1.03 | 0.42–2.90 | 0.954   | 12           | 3.94 | 0.76–72.2 | 0.190   |
| Women (ref)                         | 5           | 1.00 |           |         | 6                    | 1.00 |           |         | 1            | 1.00 |           |         |
| Notified HCV infection              |             |      |           |         |                      |      |           |         |              |      |           |         |
| Yes                                 | 21          | 3.29 | 1.39–9.07 | 0.011   | 13                   | 1.12 | 0.49–2.65 | 0.792   | 12           | 9.05 | 1.73–166  | 0.036   |
| No (ref)                            | 6           | 1.00 |           |         | 10                   | 1.00 |           |         | 1            | 1.00 |           |         |
| Notified HBV infection <sup>‡</sup> |             |      |           |         |                      |      |           |         |              |      |           |         |
| Yes                                 | 2           | 1.59 | 0.25–5.42 | 0.531   | 0                    | -    |           |         | 3            | 4.63 | 1.03–15.4 | 0.021   |
| No (ref)                            | 25          | 1.00 |           |         | 23                   |      |           |         | 10           | 1.00 |           |         |
| Notified HIV infection <sup>‡</sup> |             |      |           |         |                      |      |           |         |              |      |           |         |
| Yes                                 | 0           | -    |           |         | 4                    | 26.0 | 7.40–71.3 | <0.0001 | 0            | -    |           |         |
| No (ref)                            | 27          |      |           |         | 19                   | 1.00 |           |         | 13           |      |           |         |

IRR=incidence rate ratio. CI=confidence interval. Ref=reference group in analysis.

\*Adjusted for current age (years), calendar year, sex and time-dependent HCV notification status, HBV notification status and HIV notification status

<sup>†</sup>IRR refers to one year increase

<sup>‡</sup>IRRs could not be calculated if a cancer case did not occur in one of the binary groupings

Note: Infection groupings are not mutually exclusive

## ACKNOWLEDGEMENTS

We thank the NSW Ministry of Health for providing the Pharmaceutical Drugs of Addiction System data, and Pia Salmelainen of the Pharmaceutical Services Branch, NSW Health, for her assistance with data extraction and interpretation. We are also grateful to the staff of the state and territory cancer registries and Health Departments for the use of their data on cancer and notifiable diseases respectively. We thank the Australian Institute of Health and Welfare and the Centre for Health Record Linkage for conducting the data linkage. We are indebted to Preeyaporn Srasuebkul, Michael Falster, and Sadaf Marashi-Pour for biostatistical advice and assistance.

## CONTRIBUTORS

The study was conceived and designed by CMV, LB and LD. The data were obtained from data custodians by LM, NSM and CMV. All authors contributed to the analytical plans. The data were prepared and analysed by AS. AS, CMV and LD drafted the paper. All authors reviewed, revised and approved the final draft. CMV is the guarantor.

## FUNDING

National Health and Medical Research Council (NHMRC; ID630531) and Faculty of Medicine, University of New South Wales. AEG is supported by an NHMRC principal research fellowship (ID568819). LD is supported by an NHMRC Senior Research Fellowship (ID510279). CMV is supported by an NHMRC Career Development Fellowship (ID1023159) and a Cancer Institute New South Wales Career Development Fellowship (ID10/CDF/2-42). The funding bodies played no role in the study design or conduct, data collection, analysis or interpretation of data, in the writing of the article or the decision to submit the article for publication.

**COMPETING INTERESTS**

All authors report no disclosures.

**ETHICS APPROVAL**

The study was reviewed and approved by all relevant ethics committees and the requirement for informed consent was waived because the researchers received only de-identified data.

**DATA SHARING STATEMENT**

There is no additional data available.

## REFERENCES

1. Nelson PK, Mathers BM, Cowie B, *et al*. Global epidemiology of hepatitis B and hepatitis C in people who inject drugs: results of systematic reviews. *Lancet* 2011;378:571-83.
2. Best D, Lehmann P, Gossop M, *et al*. Eating too little, smoking and drinking too much: wider lifestyle problems among methadone maintenance patients. *Addic Res Theory* 1998;6:89-98.
3. Plitt SS, Sherman SG, Viscidi RP, *et al*. Human papillomavirus seroprevalence among young male and female drug users. *Sex Transm Dis* 2007;34:676-80.
4. Degenhardt L, Mathers BM, Vickerman P, *et al*. Prevention of HIV infection for people who inject drugs: why individual, structural, and combination approaches are needed. *Lancet* 2010;376:285-301.
5. Bell J, Burrell T, Indig D, *et al*. Cycling in and out of treatment; participation in methadone treatment in NSW, 1990–2002. *Drug Alcohol Depend* 2006;81:55-61.
6. Degenhardt L, Bucello C, Mathers B, *et al*. Mortality among regular or dependent users of heroin and other opioids: a systematic review and meta-analysis of cohort studies. *Addiction* 2011;106:32-51.
7. The Kirby Institute. HIV, viral hepatitis and sexually transmissible infections in Australia Annual Surveillance Report 2011. Sydney, NSW: The Kirby Institute, the University of New South Wales 2011.
8. Ferreros I, Lumbreras B, Hurtado I, *et al*. The shifting pattern of cause-specific mortality in a cohort of human immunodeficiency virus-infected and non-infected injecting drug users. *Addiction* 2008;103:651-9.
9. Brambilla G, Martelli A. Genotoxicity and carcinogenicity studies of analgesics, anti-inflammatory drugs and antipyretics. *Pharmacol Res* 2009;60:1-17.

10. Rosenkrantz H, Fleischman RW. In vivo carcinogenesis assay of DL-methadone.HCl in rodents. *Fundam Appl Toxicol* 1988;11:640-51.
11. Clegg LX, Hankey BF, Tiwari R, *et al.* Estimating average annual per cent change in trend analysis. *Stat Med* 2009;28:3670-82.
12. Grulich AE, Wan X, Law MG, *et al.* Risk of cancer in people with AIDS. *AIDS* 1999;13:839-43.
13. Amin J, Dore GJ, O'Connell DL, *et al.* Cancer incidence in people with hepatitis B or C infection: A large community-based linkage study. *J Hepatol* 2006;45:197-203.
14. Rothman KJ, Greenland, S., Lash, T.L. *Modern Epidemiology*. 3rd edition. Philadelphia: Lippincott Williams & Wilkins 2008.
15. Rostgaard K. Methods for stratification of person-time and events - a prerequisite for Poisson regression and SIR estimation. *Epidemiol Perspect Innov* 2008;5:7.
16. Kariminia A, Butler T, Corben S, *et al.* Mortality among prisoners: how accurate is the Australian National Death Index? *Aust NZ J Pub Health* 2005;29:572-5.
17. Stafford J, Burns L. *Australian Drug Trends 2010. Findings from the Illicit Drug Reporting System (IDRS)*. Sydney: National Drug and Alcohol Research Centre, UNSW 2011.
18. Mathers BM, Degenhardt L, Phillips B, *et al.* Global epidemiology of injecting drug use and HIV among people who inject drugs: a systematic review. *Lancet* 2008;372:1733-45.
19. Gachupin-Garcia A, Selwyn PA, Budner NS. Population-based study of malignancies and HIV infection among injecting drug users in a New York City methadone treatment program, 1985-1991. *AIDS* 1992;6:843-8.
20. Grinshpoon A, Barchana M, Lipshitz I, *et al.* Methadone maintenance and cancer risk: An Israeli case registry study. *Drug Alcohol Depend* 2011;119:88-92.

- 1
- 2
- 3 21. Bouvard V, Baan R, Straif K, *et al.* A review of human carcinogens - Part B:
- 4
- 5 Biological agents. *Lancet Oncology* 2009;10:321-2.
- 6
- 7 22. Shiels MS, Pfeiffer RM, Gail MH, *et al.* Cancer Burden in the HIV-Infected
- 8
- 9 Population in the United States. *J Natl Cancer Inst* 2011;103:753-62.
- 10
- 11 23. Australian Institute of Health and Welfare. National Opioid Pharmacotherapy
- 12
- 13 Statistics Annual Data Collection: 2010 report. Canberra, ACT: AIHW 2011.
- 14
- 15 24. Reddy RG, Aung T, Karavitaki N, *et al.* Opioid induced hypogonadism. *BMJ*
- 16
- 17 2010;341:c4462.
- 18
- 19 25. Eliassen A, Spiegelman D, Xu X, *et al.* Urinary estrogens and estrogen metabolites
- 20
- 21 and subsequent risk of breast cancer among premenopausal women. *Cancer Res*
- 22
- 23 2012;72:696-706.
- 24
- 25 26. Roddam A, Allen N, Appleby P, *et al.* Endogenous sex hormones and prostate cancer:
- 26
- 27 a collaborative analysis of 18 prospective studies. *J Natl Cancer Inst* 2008;100:170-
- 28
- 29 83.
- 30
- 31 27. Burns L, Mattick RP, Cooke M. The use of record linkage to examine illicit drug use
- 32
- 33 in pregnancy. *Addiction* 2006;101:873-82.
- 34
- 35 28. Kelsey JL, Gammon MD, John EM. Reproductive factors and breast cancer.
- 36
- 37 *Epidemiol Rev* 1993;15:36-47.
- 38
- 39 29. Hsieh C-C, Trichopoulos D, Katsouyanni K, *et al.* Age at menarche, age at
- 40
- 41 menopause, height and obesity as risk factors for breast cancer: Associations and
- 42
- 43 interactions in an international case-control study. *Int J Cancer* 1990;46:796-800.
- 44
- 45 30. Chander G, Sulkowski MS, Jenckes MW, *et al.* Treatment of chronic hepatitis C: A
- 46
- 47 systematic review. *Hepatology* 2002;36:s135-44.
- 48
- 49 31. Novick DM, Kreek MJ. Critical issues in the treatment of hepatitis C virus infection
- 50
- 51 in methadone maintenance patients. *Addiction* 2008;103:905-18.
- 52
- 53
- 54
- 55
- 56
- 57
- 58
- 59
- 60

- 1  
2  
3 32. Mehta SH, Genberg BL, Astemborski J, *et al.* Limited uptake of hepatitis C treatment  
4 among injection drug users. *J Community Health* 2008;33:126-33.  
5  
6  
7 33. Clarke JG, Stein MD, McGarry KA, *et al.* Interest in smoking cessation among  
8 injection drug users. *Am J Addict* 2001;10:159-66.  
9  
10  
11 34. Reid MS, Fallon B, Sonne S, *et al.* Smoking cessation treatment in community-based  
12 substance abuse rehabilitation programs. *J Subst Abuse Treat* 2008;35:68-77.  
13  
14  
15  
16  
17  
18  
19  
20  
21  
22  
23  
24  
25  
26  
27  
28  
29  
30  
31  
32  
33  
34  
35  
36  
37  
38  
39  
40  
41  
42  
43  
44  
45  
46  
47  
48  
49  
50  
51  
52  
53  
54  
55  
56  
57  
58  
59  
60



1  
2  
3 **The importance of blood-borne viruses in elevated cancer risk among opioid dependent**  
4 **people: a population-based cohort study**  
5  
6  
7

8  
9 Alexander Swart<sup>1</sup>, Lucinda Burns<sup>2</sup>, Limin Mao<sup>3</sup>, Andrew E. Grulich<sup>4</sup>, Janaki Amin<sup>4</sup>, Dianne  
10 L. O'Connell<sup>5,6,7,8</sup>, Nicola S. Meagher<sup>1</sup>, Deborah A. Randall<sup>9</sup>, Louisa Degenhardt<sup>2,10</sup>, Claire  
11 M. Vajdic<sup>1</sup>  
12  
13  
14  
15

16  
17  
18 1 Adult Cancer Program, Lowy Cancer Research Centre, Prince of Wales Clinical School,  
19 Faculty of Medicine at the University of New South Wales, NSW 2052, Australia.  
20

21  
22 2 National Drug and Alcohol Research Centre, Faculty of Medicine at the University of New  
23 South Wales, NSW 2052, Australia  
24  
25

26  
27 3 National Centre in HIV Social Research, Faculty of Arts and Social Sciences at the  
28 University of New South Wales, NSW 2052, Australia  
29  
30

31  
32 4 Kirby Institute, Faculty of Medicine at the University of New South Wales, NSW 2052,  
33 Australia  
34  
35

36 5 Cancer Research Division, Cancer Council NSW, NSW 2011, Australia  
37

38 6 School of Medicine and Public Health, Faculty of Health, University of Newcastle  
39

40 7 School of Public Health and Community Medicine, University of New South Wales, NSW  
41 2052, Australia  
42  
43

44 8 Sydney Medical School – Public Health, University of Sydney, NSW 2006, Australia  
45

46 9 School of Medicine, University of Western Sydney, NSW 2751, Australia  
47

48 10 Centre for Health Policy, Programs and Economics, School of Population Health,  
49 University of Melbourne, Victoria 3010, Australia  
50  
51  
52  
53  
54  
55  
56  
57  
58  
59  
60

**Corresponding author**

Claire M. Vajdic, Adult Cancer Program, Lowy Cancer Research Centre, University of New South Wales, NSW 2052, Australia. Phone (61-2) 9385 1424; fax (61-2) 9385 1430; email: [claire.vajdic@unsw.edu.au](mailto:claire.vajdic@unsw.edu.au)

**Key words**

Cancer risk, opioid dependence, pharmacotherapy, opioid substitution therapy, blood-borne viruses.

Word count (abstract): ~~28691~~

Word count (text): ~~326420~~

Number of tables: 4

Number of figures: 3

Number of references: 34

## ARTICLE SUMMARY

### Article focus

- While opioids and opioid substitution therapies themselves are not known to be carcinogenic, opioid dependence is associated with exposure to a number of carcinogenic agents, including infection by the blood-borne viruses hepatitis B, hepatitis C, and HIV.
- The risk of cancer in opioid dependence has been examined in two studies with insufficient power to address risk for all cancer types.
- There is no prior evidence on the association between blood-borne virus infection and cancer risk in people who are opioid dependent.

### Key messages

- People who are opioid dependent have an excess risk of a range of cancers compared with the general population.
- The excess cancer risk is predominantly restricted to those with blood-borne virus infection.
- Cancer incidence rates have increased dramatically over time, supporting use of the opioid substitution therapy setting to opportunistically implement targeted cancer prevention strategies.

### Strengths and limitations

- The study is based on a large population-based cohort with infections and outcomes obtained from population-based registries.
- Misclassification of infection by blood-borne viruses is possible because not all OST recipients will have been routinely tested.
- Data on smoking, alcohol use, blood-borne virus treatment and vaccination are not available.

**ABSTRACT**

**Objective** To quantify cancer risk in opioid dependence and the association with infection by the oncogenic blood-borne viruses (BBVs) hepatitis C (HCV), hepatitis B (HBV), and HIV infection.

**Design** Cohort study.

**Setting** New South Wales, Australia.

**Participants** 45 412 adults aged 16 years or over registered for opioid substitution therapy (OST) between 1985 and 2007. Notifications of cancer, death, and infection with HCV, HBV, and HIV were ascertained by record linkage with registries.

**Main outcome measures** The ratios of observed to expected number of cancers, standardised incidence ratios (SIRs), and the average annual percent change (AAPC) in overall age and sex-standardised cancer incidence.

**Results** Overall cancer risk was modestly increased compared to the general population (SIR 1.15, 95% CI 1.07 to 1.23). Excess risk was observed for 11 cancers, particularly lung (4.02, 95% CI 3.32 to 4.82), non-Hodgkin lymphoma (1.51, 95% CI 1.20 to 1.88), and liver (8.04, 95% CI 6.18 to 10.3). Reduced risk was observed for six cancers, including prostate (0.16, 95% CI 0.06 to 0.32) and breast (0.48, 95% CI 0.35 to 0.62). Individuals notified with HCV or HBV had a markedly increased risk of liver cancer; lung cancer risk was also increased in those with HCV. HIV was associated with an elevated risk of liver, anus, and kidney cancer, non-Hodgkin lymphoma and Kaposi sarcoma. Cancer risk was not increased in individuals without a BBV notification, apart from pancreatic cancer (3.92, 95% CI 1.07 to 10.0). Cancer incidence increased significantly over time (AAPC 9.4%, 4.2 to 15%,  $p=0.001$ ).

**Conclusions** BBVs play a major role in the cancer risk profile of opioid-dependent individuals registered for OST. To address the dramatic increasing trend in cancer incidence,

1  
2  
3 the OST setting ~~shc~~ could be utilised for cancer prevention ~~targeted~~ strategies including BBV  
4  
5 prevention and treatment.  
6  
7  
8  
9  
10  
11  
12  
13  
14  
15  
16  
17  
18  
19  
20  
21  
22  
23  
24  
25  
26  
27  
28  
29  
30  
31  
32  
33  
34  
35  
36  
37  
38  
39  
40  
41  
42  
43  
44  
45  
46  
47  
48  
49  
50  
51  
52  
53  
54  
55  
56  
57  
58  
59  
60

## INTRODUCTION

Opioid-dependent individuals are exposed to a multitude of carcinogens. People who inject drugs are more likely to have hepatitis C (HCV), hepatitis B (HBV) or human immunodeficiency virus (HIV).<sup>1</sup> Tobacco-smoking and hazardous alcohol use are extremely common,<sup>2</sup> as are risky sexual practices, resulting in high rates of infection with human papillomavirus (HPV).<sup>3</sup> Although it is an effective treatment for heroin and other opioid dependence,<sup>4</sup> opioid substitution therapy (OST) use is typically cyclic,<sup>5</sup> with relapse to drug injection a common occurrence.

In Australia, the long-standing and widespread availability of OST and public health initiatives such as needle and syringe programmes (NSPs) have extended the life expectancy of opioid-dependent people.<sup>4,6</sup> In injecting drug users, the prevalence of HIV is low (<1% in heterosexuals), whereas the prevalence of hepatitis C is high (50-60%).<sup>7</sup> ~~and~~ However one of the consequences of ~~this-their~~ increased longevity ~~success~~ of opioid-dependent people is the attendant risk of age-related health conditions, including cancer.<sup>8</sup> The OST agents themselves are not considered risk factors for cancer as murine studies indicate they are not carcinogenic.<sup>9,10</sup>

Despite evidence of exposure to multiple cancer risk factors and the public health impact that this may have upon ageing cohorts of opioid-dependent people, there has been no population-based study of the spectrum of cancer risk in this group and no study of this risk in relation to blood-borne virus (BBV) infection. We examined these associations among 45412 people who entered OST in New South Wales (NSW), Australia over a 23-year period, considering 1) overall and site-specific cancer incidence, 2) the cancer risk profiles of those infected with HCV, HBV, and HIV, and 3) trends in cancer incidence over time.

## METHODS

### Study population

We conducted a cohort study using record linkage between existing population-based health datasets. The study population comprised individuals registered on the Pharmaceutical Drugs of Addiction System, a record of all NSW Health Department authorities that administer methadone or buprenorphine to opioid-dependent people. Included were all adults ( $\geq 16$  years) registered for OST between 1st January 1985, the date of inception of the system, and 31st December 2007, the latest date for which cancer diagnoses were available ( $n=45\,483$ ). Individuals were excluded from the cohort if information essential for record linkage was incomplete ( $n=10$ , 0.02%) or if the OST end date preceded the start date ( $n=61$ , 0.13%). Registrants diagnosed with cancer prior to commencing OST ( $n=183$ , 0.40%) were not excluded; however they did not contribute time at risk for that cancer.

HBV and HCV notification data were available for NSW residents only from 1993. Therefore our analyses of cancer risk in those with hepatitis notifications and those with no BBVs (no HCV, HBV, or HIV notification) were restricted to a sub-cohort of individuals registered for OST from 1st January 1993 ( $n=32\,075$ ). To limit the potential for under-ascertainment of hepatitis notifications, interstate OST registrants ( $n=2\,462$ , 7.68%) were excluded and other OST registrants were censored when they moved interstate OST ( $n=2\,297$ , 7.76%).

### Data collection

In Australia, all deaths, newly diagnosed cancers (excluding basal and squamous cell carcinoma of the skin), and HCV, HBV, and HIV infections must be reported to government agencies by statute. Dates of death in OST registrants were ascertained by linkage with the

1  
2  
3 National Death Index (1980–2007). The date of diagnosis, topography and morphology of  
4  
5 incident cancers were identified by linkage with the Australian Cancer Database, a register of  
6  
7 incident primary invasive neoplasms (1982–2007). Solid cancers were classified according to  
8  
9 the International Classification of Diseases (ICD), 10th revision while haematopoietic  
10  
11 neoplasms and Kaposi sarcomas were classified according to the ICD for Oncology, 3rd  
12  
13 edition. Dates of HIV and acquired immunodeficiency syndrome (AIDS) notifications were  
14  
15 ascertained by linkage with the National HIV Database (1985–2007) and the National AIDS  
16  
17 Register (1982–2007), respectively. Linkage with the NSW Health Notifiable Conditions  
18  
19 Information Management System (1993–2007) identified dates of HBV and HCV  
20  
21 notifications for the sub-cohort, based on detection of HBV surface antigen or HBV DNA  
22  
23 and anti-HCV antibody or HCV RNA, respectively.  
24  
25  
26  
27  
28

29  
30 The name, sex, date of birth, date of death, and state of residence of registrants were used for  
31  
32 record linkage. All linkages used probabilistic matching techniques except the HIV/AIDS  
33  
34 linkage which used deterministic methods because only the first two letters of the given name  
35  
36 and surname, not full name, were recorded on these registers.  
37  
38  
39

40  
41 Cancer incidence rates for the Australian population were obtained from the Australian  
42  
43 Cancer Database by five-year age group, sex, calendar year, and state/territory, for 1985 to  
44  
45 2007.  
46  
47  
48

## 49 **Data analysis**

50  
51  
52 Cancer incidence  
53  
54  
55  
56  
57  
58  
59  
60



1  
2  
3 Person-years of follow-up accumulated from the date of first OST registration and terminated  
4  
5 at the first occurrence of cancer diagnosis, death, age 80, interstate transfer (for BBV  
6  
7 analyses only), or 31st December 2007.  
8  
9

10  
11 Crude and age/sex-standardised cancer incidence rates, standardised to the 1996 Australian  
12  
13 population, and Poisson 95% confidence intervals (CIs) were calculated using annual  
14  
15 Australian population estimates from the Australian Bureau of Statistics. To describe overall  
16  
17 cancer incidence trends over time the average annual per cent change (AAPC) was estimated  
18  
19 using Poisson regression.<sup>11</sup>  
20  
21  
22  
23

#### 24 25 Relative risk of cancer

26  
27 Risk of cancer overall and for each cancer type were examined in the full cohort (1985–2007)  
28  
29 and the sub-cohort (1993–2007) using the standardised incidence ratio (SIR), the ratio of the  
30  
31 observed and the expected numbers of cancers. The expected numbers of incident cancers  
32  
33 were calculated by multiplying cohort person-years at risk by five-year age-, sex-, state-, and  
34  
35 calendar year-specific population cancer incidence rates. The exception was Kaposi sarcoma,  
36  
37 where 1982 population rates were used to avoid the impact of AIDS on the incidence of this  
38  
39 cancer. The SIRs were computed for cancer overall and for the most frequently occurring  
40  
41 cancers by sex and age at follow-up (<40, 40–49, ≥50years). In addition, SIRs were  
42  
43 calculated by BBV notification status; HIV with or without HBV or HCV; HBV  
44  
45 monoinfection; HCV monoinfection; HBV/HCV co-infection; and HBV/HCV/HIV  
46  
47 uninfected. BBV infection was examined in a time-dependent manner, accounting for change  
48  
49 in notification status over time.  
50  
51  
52  
53  
54  
55  
56  
57  
58  
59  
60

1  
2  
3 For registrants with an AIDS notification only or an HIV notification occurring less than five  
4  
5 years before the AIDS notification (n=59, 0.13%), the date of HIV infection was backdated to  
6  
7 five years prior to the AIDS notification or to the date of cohort entry, whichever occurred  
8  
9 later, to more accurately estimate the date of HIV infection. The resultant retrospectively  
10  
11 defined person-years were survival-adjusted by applying period-specific, all-age, sex-, and  
12  
13 site-specific cancer survival rates to account for those individuals with HIV infection who  
14  
15 may have developed cancer and subsequently died before being diagnosed with HIV.<sup>12</sup> A  
16  
17 similar adjustment was performed as a sensitivity analysis for liver cancer risk in those  
18  
19 notified with HCV, assuming a median age at infection of 25 years for injecting drug user  
20  
21 (IDU)-acquired infection<sup>13</sup> and backdating HCV infection up to 15 years.  
22  
23  
24  
25  
26

27 We compared patterns of cancer risk for the BBV subgroups but could not compare SIRs  
28  
29 statistically because of the heterogeneity in subgroup age and sex distributions.<sup>14</sup>  
30  
31  
32  
33

34 Within-cohort risk factors were examined for the most frequently occurring cancers in the  
35  
36 sub-cohort (1993–2007); liver, lung, and non-Hodgkin lymphoma. Sex and the time-  
37  
38 dependent factors—current age, calendar year, and HBV, HCV, and HIV notification—were  
39  
40 *a priori* included in all multivariable models. Poisson regression was used to determine  
41  
42 incidence rate ratios (IRRs) with 95% CIs.  
43  
44  
45  
46

47 Analyses were performed using SAS<sup>®</sup> software v9.2 (SAS Institute Inc., Cary, NC, USA) and  
48  
49 Joinpoint Regression Program, v3.5 (Statistical Methodology and Applications Branch and  
50  
51 Data Modeling Branch, Surveillance Research Program, National Cancer Institute). Person-  
52  
53 years were calculated using the *%stratify* macro.<sup>15</sup>  
54  
55  
56  
57  
58  
59  
60

## RESULTS

After applying exclusion criteria, 45 412 individuals registered for OST between 1985 and 2007 were included in the study cohort (Table 1a). This cohort accumulated 481 936 person-years of follow-up for cancer, a median of 9.9 person-years per registrant (interquartile range [IQR] 5.61 to 15.2; Table 1a). Two-thirds of the cohort was male. The median age at OST registration was 27 years and the median cumulative time on OST was 2.6 years (IQR 0.6 to 6.5). A total of 423 (0.8%) registrants were notified with a HIV/AIDS diagnosis prior to or after OST registration.

We observed 819 (1.8%) incident primary cancers (803 first, 16 second cancers) after OST registration and the median age at diagnosis of first cancer was 43 (IQR 37 to 49) years.

After applying further exclusion criteria, the sub-cohort with assessable hepatitis data comprised 29 613 participants entering OST between 1993 and 2007 (Table 1b). They were of similar age and sex as the full cohort (median age at OST registration, 26 years; 69% male). A total of 14 892 (50%) registrants were notified with HCV alone, 598 (2%) with HBV alone, and 898 (3%) with HBV and HCV. Over the 213 008 person-years of follow-up in the sub-cohort, 240 (0.8%) incident cancers were observed.

### Cancer incidence

For the period 1985 to 2007 the crude cancer incidence rate was 170 per 100 000 person-years (95% CI 159 to 182). The age-standardised rate was 349 per 100 000 person-years (95% CI 337 to 361) and the annual age-standardised rate increased significantly between 1985 and 2007 (AAPC=9.4%, 95% CI 4.2 to 15%; p=0.001).

### **Cancer risk**

Risk of cancer overall was slightly higher in OST registrants compared to the Australian population (SIR=1.15, 95% CI 1.07 to 1.23). SIRs were significantly greater than unity for cancers of the tonsil, anus and anal canal, liver, pancreas, larynx, trachea bronchus and lung, vulva and cervix, Kaposi sarcoma, non-Hodgkin lymphoma and cancer of unknown primary site (Figure 1). Conversely, SIRs were significantly less than unity for melanoma and cancers of the colorectum, breast, prostate, brain and central nervous system and thyroid.

Risk of any cancer was significantly increased in men and in those more than 40 years of age (Table 2). Liver and lung cancer risk was increased in men and women; liver cancer risk was significantly increased only for those more than 40 years of age, while lung cancer risk was increased regardless of attained age. Similarly, women of all ages experienced half the risk of breast cancer.

### **Blood-borne viruses and cancer risk**

Thirty-four cancers were observed in registrants notified with HIV (irrespective of infection with other BBVs), with an SIR of 6.68 (95% CI 4.63 to 9.34; Figure 2). SIRs were significantly greater than unity for several cancers, including Kaposi sarcoma, non-Hodgkin lymphoma, and anal cancer.

In those notified with HCV monoinfection, the overall risk of cancer was not significantly different from that of the general population (SIR=1.06, 95% CI 0.89 to 1.25; Figure 3) but the SIR for liver cancer was 6.61 (95% CI 3.02 to 12.5). After adjusting for an assumed age of HCV infection of 25 years and for survival, the SIR for liver cancer increased to 13.1

1  
2  
3 (95% CI 6.00 to 24.9). Risk of lung cancer and mouth cancer were also elevated. On the other  
4  
5 hand, breast cancer risk was decreased and while six prostate cancers were expected, none  
6  
7 were observed. Few cancers were observed in those notified with HBV (one case) or HBV-  
8  
9 HCV co-infection (18 cases). The risk of liver cancer in individuals notified with HBV-HCV  
10  
11 co-infection was markedly elevated (SIR=35.9, 95% CI 7.41 to 105).  
12  
13

14  
15  
16 Registrants without a notification of BBV infection were at decreased risk of cancer overall  
17  
18 (SIR=0.68, 95% CI 0.54 to 0.84; Figure 3) and melanoma. In this subgroup, no infection-  
19  
20 related cancers occurred at rates significantly different to the general population; however the  
21  
22 risk of pancreatic cancer was significantly elevated.  
23  
24

25  
26  
27 In multivariable analyses adjusting for age, calendar year, sex and HCV, HBV, and HIV  
28  
29 notification status, age was an independent risk factor for the most frequently occurring  
30  
31 cancers (Table 3). Notification of HBV and HCV infection predicted risk of liver cancer, and  
32  
33 notification of HIV infection predicted risk of non-Hodgkin lymphoma. Notification of HCV  
34  
35 infection independently predicted risk of lung cancer.  
36  
37  
38  
39

## 40 **DISCUSSION**

41  
42 We found that cancer risk in opioid-dependent people registered for OST was significantly  
43  
44 increased for a number of cancers causally related to infection with oncogenic viruses,  
45  
46 smoking, and alcohol consumption. The excess cancer risk was almost entirely restricted to  
47  
48 those notified with a BBV infection, except for pancreatic cancer. The most common cancers  
49  
50 for which there was an excess risk were independently associated with increasing age and  
51  
52 infection by one or more BBVs; liver cancer (HCV, HBV), lung cancer (HCV), and non-  
53  
54  
55  
56  
57  
58  
59  
60

1  
2  
3 Hodgkin lymphoma (HIV). Cancer incidence also increased significantly over time,  
4  
5 highlighting cancer as an emerging public health concern for this population.  
6  
7  
8

### 9 10 **Strengths and weaknesses**

11  
12 The strengths of this study include the large population size and the lengthy follow-up, which  
13  
14 provided the statistical power to improve upon sparse knowledge of the cancer risk faced by  
15  
16 the opioid dependent population. Additionally, use of national, population-based registers for  
17  
18 ascertainment of cancer diagnoses, HIV/AIDS diagnoses, and deaths enabled unbiased and  
19  
20 comprehensive follow-up of the cohort. On the other hand, although routine testing for BBV  
21  
22 infection is recommended, it is likely that not all OST recipients were routinely tested, and  
23  
24 use of the notification date in analysis underestimates the timing of the infection. We also  
25  
26 lacked data on BBV treatment and HBV vaccination. Furthermore, it was not possible to  
27  
28 determine serological clearance of HCV. Thus it is possible that we have misclassification  
29  
30 with respect to BBV infection, meaning that we have under-estimated the association of  
31  
32 chronic HCV infection with cancer in OST registrants.  
33  
34  
35  
36  
37  
38

39  
40 In addition, this study was retrospective, relying upon linkage with routinely collected  
41  
42 administrative data, and some false positive and negative linkages do occur. Nevertheless,  
43  
44 quality assurance practices performed by the data linkage units can result in high sensitivity  
45  
46 and specificity (e.g. hepatitis linkage sensitivity >99.9%, specificity 99.8%).<sup>16</sup> The lack of  
47  
48 data on smoking and alcohol use of the OST recipients meant that we could not examine the  
49  
50 contribution by these agents to the excess risk of liver and lung cancer in those with BBV  
51  
52 infection. Given it is likely that around 50% of Australians with opioid dependence enter  
53  
54 OST at some point,<sup>17</sup> our findings are likely to be generalisable to the broader opioid  
55  
56 dependent population. Our cohort being a representative sample is supported by the similarity  
57  
58  
59  
60

1  
2  
3 of BBV prevalence with NSP survey results.<sup>7</sup> With respect to other OST populations, our  
4  
5 data may represent a conservative estimate of the public health burden given the markedly  
6  
7 lower incidence of HIV infection in comparison to most other countries.<sup>18</sup>  
8  
9

## 10 11 12 **Context**

13  
14 This is the first population-based study of cancer incidence among people who are opioid  
15  
16 dependent, and the first study to examine cancer incidence in relation to BBV infection. Of  
17  
18 the two prior studies measuring cancer incidence in opioid dependent [populations/individuals](#),  
19  
20 one had very limited statistical power and examined a US cohort of mostly Hispanic injecting  
21  
22 drug users with a high prevalence of HIV,<sup>19</sup> while the other studied Israeli OST recipients but  
23  
24 did not link with a population-based death registry and examined risk for only eight cancer  
25  
26 types.<sup>20</sup>  
27  
28  
29  
30  
31

## 32 **Explanations**

33  
34 Apart from Kaposi sarcoma, the strongest excess cancer risk in those registered for OST was  
35  
36 observed for liver cancer. Stratification by BBV notification and within-cohort risk factor  
37  
38 analyses showed that this excess risk occurred only in those with BBV infection, especially  
39  
40 HCV alone or HCV/HBV co-infection. Surveillance bias did not strongly affect our risk  
41  
42 estimates, as only one liver cancer was diagnosed within six months of commencing OST.  
43  
44 Lung cancer risk was elevated in the cohort overall and in the subgroup with HCV. Whilst  
45  
46 HCV notification independently predicted lung cancer risk, there is no evidence of a  
47  
48 biological link and this result may indicate those with HCV smoke more heavily than those  
49  
50 without HCV. Tobacco exposure may also explain the excess risk of mouth cancer in this  
51  
52 subgroup. The excess risk of liver<sup>20</sup> and lung<sup>19,20</sup> cancer is consistent with prior evidence.  
53  
54  
55  
56  
57  
58  
59  
60

1  
2  
3 An excess risk of Kaposi sarcoma, non-Hodgkin lymphoma, and anal cancer was observed in  
4  
5 OST registrants overall, particularly those with HIV. These cancers have an established  
6  
7 causal association with HIV-related immunosuppression and are likely to result from  
8  
9 impaired immune surveillance in people with infection by Kaposi sarcoma-associated  
10  
11 herpesvirus, Epstein-Barr virus, and HPV, respectively.<sup>21</sup> An excess risk of five non-AIDS-  
12  
13 defining malignancies was also observed, supporting evidence that these cancers are  
14  
15 becoming increasingly important for those with HIV infection.<sup>22</sup>  
16  
17  
18  
19

20  
21 A number of cancers occurred at rates significantly lower than in the matched general  
22  
23 population. For melanoma, two explanations are suggested. Firstly, Aboriginal Australians,  
24  
25 who experience one-tenth the risk of melanoma compared to non-Aboriginal Australians, are  
26  
27 over-represented in the OST population compared to the general population (11% vs. 1.5–  
28  
29 2.0%).<sup>23</sup> Secondly, 69% of a recent sample (n=154) of active IDUs in NSW reported a  
30  
31 history of incarceration,<sup>17</sup> which limits sun exposure, an established risk factor for melanoma.  
32  
33 Under-participation in population-based and other cancer screening programs may explain  
34  
35 the reduced risk of breast, colorectal and prostate cancer in OST recipients. However, only  
36  
37 4% of the total follow-up time was contributed by individuals who were age-eligible for these  
38  
39 programs, substantially weakening the case for attenuation in risk due to under-participation  
40  
41 in screening. A reduced risk of colorectal and breast cancer was observed in Israeli OST  
42  
43 recipients,<sup>20</sup> and there is some evidence that opioid use may impart a decreased risk of certain  
44  
45 cancers. For example, a side-effect of chronic opioid use is hypogonadism, resulting in low  
46  
47 oestrogen (women) and testosterone (men).<sup>24</sup> Low levels of these hormones may decrease  
48  
49 premenopausal breast cancer and prostate cancer risk, however the evidence is  
50  
51 inconclusive.<sup>25, 26</sup> Characteristics common to OST registrants, high parity and early age at  
52  
53  
54  
55  
56  
57  
58  
59  
60



1  
2  
3 first pregnancy,<sup>17, 27</sup> both considered protective for breast cancer,<sup>28</sup> as well as reduced  
4  
5 prevalence of overweight and obesity,<sup>29</sup> may also contribute to the observed risk reduction.  
6  
7  
8  
9  
10  
11  
12  
13  
14  
15  
16  
17  
18  
19  
20  
21  
22  
23  
24  
25  
26  
27  
28  
29  
30  
31  
32  
33  
34  
35  
36  
37  
38  
39  
40  
41  
42  
43  
44  
45  
46  
47  
48  
49  
50  
51  
52  
53  
54  
55  
56  
57  
58  
59  
60

For peer review only

## Implications

The observed cancer risk profile strongly supports the implementation of targeted cancer prevention strategies in the OST setting. Given the concentration of excess risk among those with BBV notifications, and the high prevalence of HCV among this population, there is a clear need for interventions that reduce HCV incidence<sup>4</sup> and that treat people who have developed chronic infections.<sup>1</sup> NSPs are highly effective at reducing the rate of acquisition of BBVs.<sup>4</sup> Antiviral treatments for HCV and HBV infection induce regression of fibrosis and decrease liver cancer risk.<sup>30</sup> People with a history of injecting drug use respond positively to HCV therapies, with acceptable levels of sustained virological response<sup>31</sup> and antiviral therapy is also not contraindicated in people with HIV receiving OST. The issue, however, is one of coverage. Many physicians remain unwilling to provide such treatments to people who use illicit drugs in the face of evidence that they have similar levels of adherence to treatment as other patient groups.<sup>32</sup> Thus, despite HCV being one of the strongest risk factors for cancer in OST, very few people in OST have received treatment to address this risk.<sup>1</sup>

As the risks for cancers with established causal links to tobacco-smoking and alcohol use were elevated, namely lung, larynx, and pancreatic cancer (smoking), and liver, oral, larynx, and oesophageal cancer (alcohol), a reduction in these behaviours would similarly mitigate cancer risk. OST clients show strong interest in smoking cessation programs,<sup>33</sup> and they do not adversely impact OST,<sup>34</sup> but again few are offered such treatments in routine healthcare settings. The excess risk of cancer of the cervix, vulva and anus, cancers caused by chronic infection with HPV, may be reduced by safer sexual practices. The increased risk of cervical cancer also supports the need for greater participation in cervical screening.

## Conclusions

Opioid-dependent people registered for OST face an excess risk of a variety of cancers compared to the general population, in particular cancers associated with infection by BBVs. The implementation of harm reduction strategies in the OST setting represents an evidently underutilised opportunity to respond to the escalating cancer burden facing this marginalised population.

For peer review only

1  
2  
3 **LIST OF FIGURE LEGENDS**  
4

5 **Figure 1** Risk of cancer among NSW opioid substitution therapy registrants, 1985–2007  
6

7  
8 Key  
9

10 Obs=observed number of cancers. Exp=expected number of cancers. SIR=standardised  
11 incidence ratio. CI=confidence interval. CNS=central nervous system.  
12

13  
14  
15 \*Includes non-Hodgkin lymphoma not otherwise specified (International Classification of  
16 Diseases for Oncology, 3rd edition: 9590).  
17

18  
19  
20 Non-melanoma skin cancer excludes diagnoses of basal cell and squamous cell carcinoma.  
21  
22  
23  
24

25  
26 **Figure 2** Risk of cancer in NSW opioid substitution therapy registrants with notified HIV  
27 infection, 1985–2007  
28

29  
30 Key  
31

32  
33 Obs=observed number of cancers. Exp=expected number of cancers. SIR=standardised  
34 incidence ratio. CI=confidence interval.  
35

36  
37  
38 \*Includes non-Hodgkin lymphoma not otherwise specified (International Classification of  
39 Diseases for Oncology, 3rd edition: 9590).  
40  
41  
42  
43  
44  
45

46 **Figure 3** Risk of cancer among NSW opioid substitution therapy registrants with notified  
47 hepatitis C infection and registrants without notified hepatitis B, hepatitis C or HIV infection,  
48 1993–2007  
49  
50

51  
52 Key  
53  
54  
55  
56  
57  
58  
59  
60

1  
2  
3 \*Includes non-Hodgkin lymphoma not otherwise specified (International Classification of  
4 Diseases for Oncology, 3rd edition: 9590)  
5  
6

7  
8 †SIRs not estimated for cancers with less than 3 observed cases  
9  
10  
11  
12  
13  
14  
15  
16  
17  
18  
19  
20  
21  
22  
23  
24  
25  
26  
27  
28  
29  
30  
31  
32  
33  
34  
35  
36  
37  
38  
39  
40  
41  
42  
43  
44  
45  
46  
47  
48  
49  
50  
51  
52  
53  
54  
55  
56  
57  
58  
59  
60

For peer review only

**Table 1a** Characteristics of all NSW opioid substitution therapy registrants and those with notified HIV infection, 1985–2007

|                                    | Entire cohort          |              |                  | HIV infection          |              |                  |
|------------------------------------|------------------------|--------------|------------------|------------------------|--------------|------------------|
|                                    | No. (%) of registrants | Person-years |                  | No. (%) of registrants | Person-years |                  |
|                                    |                        | Total        | Median (IQR)     |                        | Total        | Median (IQR)     |
| <b>Total</b>                       | 45 412 (100)           | 481 936      | 9.94 (5.61–15.2) | 426 (100)              | 3511         | 7.60 (3.66–12.4) |
| <b>Sex</b>                         |                        |              |                  |                        |              |                  |
| Men                                | 30 147 (66.4)          | 310 632      | 9.67 (5.31–14.8) | 346 (81.2)             | 2796         | 7.58 (3.63–11.8) |
| Women                              | 15 265 (33.6)          | 171 304      | 10.6 (6.30–16.2) | 80 (18.8)              | 715          | 7.68 (3.72–14.6) |
| <b>Age at cohort entry (years)</b> |                        |              |                  |                        |              |                  |
| <25                                | 16 266 (35.8)          | 166 503      | 9.48 (5.83–14.0) | 139 (32.6)             | 1176         | 7.38 (3.87–13.0) |
| 25–30                              | 14 680 (32.3)          | 171 073      | 11.3 (6.26–17.4) | 120 (28.2)             | 1027         | 7.96 (3.75–11.7) |
| ≥31                                | 14 466 (31.9)          | 144 361      | 9.46 (4.86–14.4) | 167 (39.2)             | 1308         | 7.25 (2.83–12.7) |
| <b>Year of cohort entry</b>        |                        |              |                  |                        |              |                  |
| 1985–1989                          | 8476 (18.7)            | 161 566      | 20.4 (18.7–21.8) | 75 (17.6)              | 887          | 10.2 (6.02–19.2) |
| 1990–1995                          | 11 220 (24.7)          | 152 938      | 14.1 (12.7–15.7) | 140 (32.9)             | 1479         | 12.8 (5.99–14.8) |
| 1996–2001                          | 15 302 (33.7)          | 133 232      | 8.84 (7.35–10.4) | 122 (28.6)             | 908          | 8.00 (6.33–9.65) |
| 2002–2007                          | 10 414 (22.9)          | 34 200       | 3.44 (1.88–4.81) | 89 (20.9)              | 237          | 2.72 (1.22–3.89) |

1  
2  
3  
4  
5  
6  
7  
8  
9  
10  
11  
12  
13  
14  
15  
16  
17  
18  
19  
20  
21  
22  
23  
24  
25  
26  
27  
28  
29  
30  
31  
32  
33  
34  
35  
36  
37  
38  
39  
40  
41  
42  
43  
44  
45  
46  
47  
48  
49

**Table 1b** Characteristics of NSW opioid substitution therapy registrants, by BBV notification status, 1993–2007

|                                    | Entire sub-cohort       |              | No BBV infection |                        | HBV mono-infection |        | HCV mono-infection     |              | HBV/HCV co-infection |                        | HIV infection <sup>†</sup> |        |            |      |      |            |      |      |
|------------------------------------|-------------------------|--------------|------------------|------------------------|--------------------|--------|------------------------|--------------|----------------------|------------------------|----------------------------|--------|------------|------|------|------------|------|------|
|                                    | No. (%) of registrants* | Person-years |                  | No. (%) of registrants | Person-years       |        | No. (%) of registrants | Person-years |                      | No. (%) of registrants | Person-years               |        |            |      |      |            |      |      |
|                                    |                         | Total        | Median           |                        | Total              | Median |                        | Total        | Median               |                        | Total                      | Median |            |      |      |            |      |      |
| <b>Total</b>                       | 29 613 (100)            | 213 008      | 7.28             | 23 650 (100)           | 109 313            | 3.53   | 598 (100)              | 2608         | 3.56                 | 14 892 (100)           | 94 331                     | 6.36   | 898 (100)  | 5249 | 6.02 | 234 (100)  | 1504 | 6.20 |
| <b>Sex</b>                         |                         |              |                  |                        |                    |        |                        |              |                      |                        |                            |        |            |      |      |            |      |      |
| Men                                | 20 348 (68.7)           | 144 932      | 7.19             | 16 352 (69.1)          | 76 495             | 3.64   | 436 (72.9)             | 1918         | 3.60                 | 9793 (65.8)            | 61 378                     | 6.29   | 643 (71.6) | 3782 | 6.10 | 204 (87.2) | 1355 | 6.55 |
| Women                              | 9265 (31.3)             | 68 076       | 7.51             | 7298 (30.9)            | 32 818             | 3.25   | 162 (27.1)             | 691          | 3.50                 | 5099 (34.2)            | 32 953                     | 6.47   | 255 (28.4) | 1466 | 5.94 | 30 (12.8)  | 148  | 4.35 |
| <b>Age at cohort entry (years)</b> |                         |              |                  |                        |                    |        |                        |              |                      |                        |                            |        |            |      |      |            |      |      |
| 15–25                              | 11 674 (39.4)           | 87 088       | 7.60             | 9915 (41.9)            | 47 340             | 3.81   | 278 (46.5)             | 1282         | 3.96                 | 5706 (38.3)            | 35 963                     | 6.41   | 351 (39.1) | 2130 | 6.27 | 61 (26.1)  | 373  | 6.08 |
| 25–30                              | 8427 (28.5)             | 60 907       | 7.32             | 6771 (28.6)            | 31 905             | 3.56   | 169 (28.3)             | 770          | 3.18                 | 4106 (27.6)            | 26 201                     | 6.42   | 266 (29.6) | 1534 | 5.79 | 68 (29.1)  | 494  | 7.73 |
| 31–40                              | 9512 (32.1)             | 65 013       | 6.74             | 6964 (29.4)            | 30 068             | 3.06   | 151 (25.3)             | 555          | 3.39                 | 5080 (34.1)            | 32 167                     | 6.23   | 281 (31.3) | 1584 | 5.71 | 105 (44.9) | 637  | 5.17 |
| <b>Year of cohort entry</b>        |                         |              |                  |                        |                    |        |                        |              |                      |                        |                            |        |            |      |      |            |      |      |
| 1993–1997                          | 10 212 (34.5)           | 111 454      | 11.7             | 8944 (37.8)            | 54 619             | 4.76   | 158 (26.4)             | 981          | 5.08                 | 3563 (23.9)            | 36 132                     | 11.2   | 129 (14.4) | 1298 | 10.9 | 84 (35.9)  | 754  | 10.7 |
| 1998–2002                          | 11 655 (39.4)           | 81 399       | 7.36             | 8962 (37.9)            | 42 095             | 5.35   | 290 (48.5)             | 1304         | 5.12                 | 6958 (46.7)            | 47 049                     | 7.05   | 475 (52.9) | 3167 | 6.80 | 82 (35.0)  | 573  | 7.55 |
| 2003–2007                          | 7746 (26.2)             | 20 155       | 2.70             | 5744 (24.3)            | 12 599             | 2.11   | 150 (25.1)             | 323          | 2.01                 | 4371 (29.4)            | 11 150                     | 2.55   | 294 (32.7) | 784  | 2.75 | 68 (29.1)  | 177  | 2.71 |

\*Category numbers will not sum to total numbers for the sub-cohort as individuals were followed-up in a time-dependent manner, allowing an individual to contribute person-years to multiple groups as their BBV notification status changed over the period of observation.

†With or without HBV or HCV notification.

**Table 2** Risk of any cancer and the most frequently occurring cancers in NSW opioid substitution therapy registrants, by sex and current age (1985–2007)

| Cancer type                        | Obs. | Exp. | SIR  | 95% CI    |
|------------------------------------|------|------|------|-----------|
| <b>All cancer</b>                  |      |      |      |           |
| Men                                | 536  | 431  | 1.24 | 1.14–1.35 |
| Women                              | 283  | 285  | 0.99 | 0.88–1.11 |
| <40 yrs                            | 282  | 295  | 0.96 | 0.85–1.07 |
| 40–49 yrs                          | 357  | 282  | 1.27 | 1.14–1.40 |
| ≥50 yrs                            | 180  | 139  | 1.30 | 1.12–1.50 |
| <b>Liver</b>                       |      |      |      |           |
| Men                                | 51   | 6.92 | 7.37 | 5.49–9.69 |
| Women                              | 12   | 0.91 | 13.2 | 6.80–23.0 |
| <40 yrs                            | 4    | 1.62 | 2.47 | 0.67–6.33 |
| 40–49 yrs                          | 26   | 3.96 | 6.57 | 4.29–9.63 |
| ≥50 yrs                            | 33   | 2.26 | 14.6 | 10.1–20.6 |
| <b>Trachea, bronchus, and lung</b> |      |      |      |           |
| Men                                | 82   | 19.8 | 4.15 | 3.32–5.11 |
| Women                              | 28   | 7.59 | 3.69 | 2.45–5.33 |
| <40 yrs                            | 15   | 4.11 | 3.65 | 2.04–6.02 |
| 40–49 yrs                          | 58   | 13.0 | 4.46 | 3.41–5.71 |
| ≥50 yrs                            | 37   | 10.2 | 3.61 | 2.57–4.90 |
| <b>Melanoma</b>                    |      |      |      |           |
| Men                                | 64   | 91.2 | 0.70 | 0.54–0.89 |
| Women                              | 37   | 48.7 | 0.76 | 0.54–1.03 |
| <40 yrs                            | 48   | 71.6 | 0.67 | 0.50–0.88 |
| 40–49 yrs                          | 37   | 51.4 | 0.72 | 0.51–0.98 |
| ≥50 yrs                            | 16   | 16.9 | 0.95 | 0.56–1.49 |
| <b>Female breast</b>               |      |      |      |           |
| <40 yrs                            | 15   | 32.5 | 0.46 | 0.27–0.74 |
| 40–49 yrs                          | 27   | 54.3 | 0.48 | 0.32–0.69 |
| ≥50 yrs                            | 6    | 14.1 | 0.43 | 0.17–0.86 |
| <b>Cervical</b>                    |      |      |      |           |
| <40 yrs                            | 21   | 11.0 | 1.90 | 1.20–2.84 |
| 40–49 yrs                          | 14   | 4.67 | 3.00 | 1.64–5.03 |
| ≥50 yrs                            | 2    | 0.63 | 3.19 | 0.39–11.5 |
| <b>Non-Hodgkin lymphoma</b>        |      |      |      |           |
| Men                                | 62   | 38.1 | 1.63 | 1.26–2.07 |
| Women                              | 13   | 11.5 | 1.13 | 0.62–1.86 |
| <40 yrs                            | 25   | 20.9 | 1.20 | 0.79–1.73 |
| 40–49 yrs                          | 37   | 19.8 | 1.87 | 1.33–2.54 |
| ≥50 yrs                            | 13   | 8.94 | 1.46 | 0.78–2.49 |

Obs=observed number of cancers. Exp=expected number of cancers. SIR=standardised incidence ratio. CI=confidence interval.



**Table 3** Multivariable analysis of risk factors for common cancers among NSW opioid substitution therapy registrants, 1993-2007

|                                     | Lung Cancer |      |           |         | Non-Hodgkin lymphoma |      |           |         | Liver Cancer |      |           |         |
|-------------------------------------|-------------|------|-----------|---------|----------------------|------|-----------|---------|--------------|------|-----------|---------|
|                                     | n           | IRR* | 95%CI     | P       | n                    | IRR* | 95%CI     | P       | n            | IRR* | 95%CI     | P       |
| Current age <sup>†</sup>            | 27          | 1.19 | 1.15–1.24 | <0.0001 | 23                   | 1.06 | 1.01–1.11 | 0.025   | 13           | 1.20 | 1.13–1.27 | <0.0001 |
| Calendar year <sup>†</sup>          | 27          | 0.91 | 0.81–1.03 | 0.131   | 23                   | 1.16 | 1.01–1.37 | 0.054   | 13           | 1.13 | 0.91–1.49 | 0.317   |
| Sex                                 |             |      |           |         |                      |      |           |         |              |      |           |         |
| Men                                 | 22          | 1.55 | 0.63–4.65 | 0.378   | 17                   | 1.03 | 0.42–2.90 | 0.954   | 12           | 3.94 | 0.76–72.2 | 0.190   |
| Women (ref)                         | 5           | 1.00 |           |         | 6                    | 1.00 |           |         | 1            | 1.00 |           |         |
| Notified HCV infection              |             |      |           |         |                      |      |           |         |              |      |           |         |
| Yes                                 | 21          | 3.29 | 1.39–9.07 | 0.011   | 13                   | 1.12 | 0.49–2.65 | 0.792   | 12           | 9.05 | 1.73–166  | 0.036   |
| No (ref)                            | 6           | 1.00 |           |         | 10                   | 1.00 |           |         | 1            | 1.00 |           |         |
| Notified HBV infection <sup>‡</sup> |             |      |           |         |                      |      |           |         |              |      |           |         |
| Yes                                 | 2           | 1.59 | 0.25–5.42 | 0.531   | 0                    | -    |           |         | 3            | 4.63 | 1.03–15.4 | 0.021   |
| No (ref)                            | 25          | 1.00 |           |         | 23                   |      |           |         | 10           | 1.00 |           |         |
| Notified HIV infection <sup>‡</sup> |             |      |           |         |                      |      |           |         |              |      |           |         |
| Yes                                 | 0           | -    |           |         | 4                    | 26.0 | 7.40–71.3 | <0.0001 | 0            | -    |           |         |
| No (ref)                            | 27          |      |           |         | 19                   | 1.00 |           |         | 13           |      |           |         |

IRR=incidence rate ratio. CI=confidence interval. Ref=reference group in analysis.

\*Adjusted for current age (years), calendar year, sex and time-dependent HCV notification status, HBV notification status and HIV notification status

<sup>†</sup>IRR refers to one year increase

<sup>‡</sup>IRRs could not be calculated if a cancer case did not occur in one of the binary groupings

Note: Infection groupings are not mutually exclusive

## ACKNOWLEDGEMENTS

We thank the NSW Ministry of Health for providing the Pharmaceutical Drugs of Addiction System data, and Pia Salmelainen of the Pharmaceutical Services Branch, NSW Health, for her assistance with data extraction and interpretation. We are also grateful to the staff of the state and territory cancer registries and Health Departments for the use of their data on cancer and notifiable diseases respectively. We thank the Australian Institute of Health and Welfare and the Centre for Health Record Linkage for conducting the data linkage. We are indebted to Preeyaporn Srasuebkul, Michael Falster, and Sadaf Marashi-Pour for biostatistical advice and assistance.

## CONTRIBUTORS

The study was conceived and designed by CMV, LB and LD. The data were obtained from data custodians by LM, NSM and CMV. All authors contributed to the analytical plans. The data were prepared and analysed by AS. AS, CMV and LD drafted the paper. All authors reviewed, revised and approved the final draft. CMV is the guarantor.

## FUNDING

National Health and Medical Research Council (NHMRC; ID630531) and Faculty of Medicine, University of New South Wales. AEG is supported by an NHMRC principal research fellowship (ID568819). LD is supported by an NHMRC Senior Research Fellowship (ID510279). CMV is supported by an NHMRC Career Development Fellowship (ID1023159) and a Cancer Institute New South Wales Career Development Fellowship (ID10/CDF/2-42). The funding bodies played no role in the study design or conduct, data collection, analysis or interpretation of data, in the writing of the article or the decision to submit the article for publication.

**COMPETING INTERESTS**

All authors report no disclosures.

**ETHICS APPROVAL**

The study was reviewed and approved by all relevant ethics committees and the requirement for informed consent was waived because the researchers received only de-identified data.

**DATA SHARING STATEMENT**

There is no additional data available.

## REFERENCES

1. Nelson PK, Mathers BM, Cowie B, *et al*. Global epidemiology of hepatitis B and hepatitis C in people who inject drugs: results of systematic reviews. *Lancet* 2011;378:571-83.
2. Best D, Lehmann P, Gossop M, *et al*. Eating too little, smoking and drinking too much: wider lifestyle problems among methadone maintenance patients. *Addic Res Theory* 1998;6:89-98.
3. Plitt SS, Sherman SG, Viscidi RP, *et al*. Human papillomavirus seroprevalence among young male and female drug users. *Sex Transm Dis* 2007;34:676-80.
4. Degenhardt L, Mathers BM, Vickerman P, *et al*. Prevention of HIV infection for people who inject drugs: why individual, structural, and combination approaches are needed. *Lancet* 2010;376:285-301.
5. Bell J, Burrell T, Indig D, *et al*. Cycling in and out of treatment; participation in methadone treatment in NSW, 1990–2002. *Drug Alcohol Depend* 2006;81:55-61.
6. Degenhardt L, Bucello C, Mathers B, *et al*. Mortality among regular or dependent users of heroin and other opioids: a systematic review and meta-analysis of cohort studies. *Addiction* 2011;106:32-51.
7. The Kirby Institute. HIV, viral hepatitis and sexually transmissible infections in Australia Annual Surveillance Report 2011. Sydney, NSW: The Kirby Institute, the University of New South Wales 2011.
8. Ferreros I, Lumbreras B, Hurtado I, *et al*. The shifting pattern of cause-specific mortality in a cohort of human immunodeficiency virus-infected and non-infected injecting drug users. *Addiction* 2008;103:651-9.
9. Brambilla G, Martelli A. Genotoxicity and carcinogenicity studies of analgesics, anti-inflammatory drugs and antipyretics. *Pharmacol Res* 2009;60:1-17.

10. Rosenkrantz H, Fleischman RW. In vivo carcinogenesis assay of DL-methadone.HCl in rodents. *Fundam Appl Toxicol* 1988;11:640-51.
11. Clegg LX, Hankey BF, Tiwari R, *et al.* Estimating average annual per cent change in trend analysis. *Stat Med* 2009;28:3670-82.
12. Grulich AE, Wan X, Law MG, *et al.* Risk of cancer in people with AIDS. *AIDS* 1999;13:839-43.
13. Amin J, Dore GJ, O'Connell DL, *et al.* Cancer incidence in people with hepatitis B or C infection: A large community-based linkage study. *J Hepatol* 2006;45:197-203.
14. Rothman KJ, Greenland, S., Lash, T.L. *Modern Epidemiology*. 3rd edition. Philadelphia: Lippincott Williams & Wilkins 2008.
15. Rostgaard K. Methods for stratification of person-time and events - a prerequisite for Poisson regression and SIR estimation. *Epidemiol Perspect Innov* 2008;5:7.
16. Kariminia A, Butler T, Corben S, *et al.* Mortality among prisoners: how accurate is the Australian National Death Index? *Aust NZ J Pub Health* 2005;29:572-5.
17. Stafford J, Burns L. *Australian Drug Trends 2010. Findings from the Illicit Drug Reporting System (IDRS)*. Sydney: National Drug and Alcohol Research Centre, UNSW 2011.
18. Mathers BM, Degenhardt L, Phillips B, *et al.* Global epidemiology of injecting drug use and HIV among people who inject drugs: a systematic review. *Lancet* 2008;372:1733-45.
19. Gachupin-Garcia A, Selwyn PA, Budner NS. Population-based study of malignancies and HIV infection among injecting drug users in a New York City methadone treatment program, 1985-1991. *AIDS* 1992;6:843-8.
20. Grinshpoon A, Barchana M, Lipshitz I, *et al.* Methadone maintenance and cancer risk: An Israeli case registry study. *Drug Alcohol Depend* 2011;119:88-92.

- 1
- 2
- 3 21. Bouvard V, Baan R, Straif K, *et al.* A review of human carcinogens - Part B:
- 4 Biological agents. *Lancet Oncology* 2009;10:321-2.
- 5
- 6
- 7 22. Shiels MS, Pfeiffer RM, Gail MH, *et al.* Cancer Burden in the HIV-Infected
- 8 Population in the United States. *J Natl Cancer Inst* 2011;103:753-62.
- 9
- 10
- 11 23. Australian Institute of Health and Welfare. National Opioid Pharmacotherapy
- 12 Statistics Annual Data Collection: 2010 report. Canberra, ACT: AIHW 2011.
- 13
- 14 24. Reddy RG, Aung T, Karavitaki N, *et al.* Opioid induced hypogonadism. *BMJ*
- 15 2010;341:c4462.
- 16
- 17
- 18 25. Eliassen A, Spiegelman D, Xu X, *et al.* Urinary estrogens and estrogen metabolites
- 19 and subsequent risk of breast cancer among premenopausal women. *Cancer Res*
- 20 2012;72:696-706.
- 21
- 22
- 23 26. Roddam A, Allen N, Appleby P, *et al.* Endogenous sex hormones and prostate cancer:
- 24 a collaborative analysis of 18 prospective studies. *J Natl Cancer Inst* 2008;100:170-
- 25 83.
- 26
- 27 27. Burns L, Mattick RP, Cooke M. The use of record linkage to examine illicit drug use
- 28 in pregnancy. *Addiction* 2006;101:873-82.
- 29
- 30
- 31 28. Kelsey JL, Gammon MD, John EM. Reproductive factors and breast cancer.
- 32 *Epidemiol Rev* 1993;15:36-47.
- 33
- 34 29. Hsieh C-C, Trichopoulos D, Katsouyanni K, *et al.* Age at menarche, age at
- 35 menopause, height and obesity as risk factors for breast cancer: Associations and
- 36 interactions in an international case-control study. *Int J Cancer* 1990;46:796-800.
- 37
- 38 30. Chander G, Sulkowski MS, Jenckes MW, *et al.* Treatment of chronic hepatitis C: A
- 39 systematic review. *Hepatology* 2002;36:s135-44.
- 40
- 41
- 42 31. Novick DM, Kreek MJ. Critical issues in the treatment of hepatitis C virus infection
- 43 in methadone maintenance patients. *Addiction* 2008;103:905-18.
- 44
- 45
- 46
- 47
- 48
- 49
- 50
- 51
- 52
- 53
- 54
- 55
- 56
- 57
- 58
- 59
- 60

- 1  
2  
3 32. Mehta SH, Genberg BL, Astemborski J, *et al.* Limited uptake of hepatitis C treatment  
4 among injection drug users. *J Community Health* 2008;33:126-33.  
5  
6  
7 33. Clarke JG, Stein MD, McGarry KA, *et al.* Interest in smoking cessation among  
8 injection drug users. *Am J Addict* 2001;10:159-66.  
9  
10  
11 34. Reid MS, Fallon B, Sonne S, *et al.* Smoking cessation treatment in community-based  
12 substance abuse rehabilitation programs. *J Subst Abuse Treat* 2008;35:68-77.  
13  
14  
15  
16  
17  
18  
19  
20  
21  
22  
23  
24  
25  
26  
27  
28  
29  
30  
31  
32  
33  
34  
35  
36  
37  
38  
39  
40  
41  
42  
43  
44  
45  
46  
47  
48  
49  
50  
51  
52  
53  
54  
55  
56  
57  
58  
59  
60

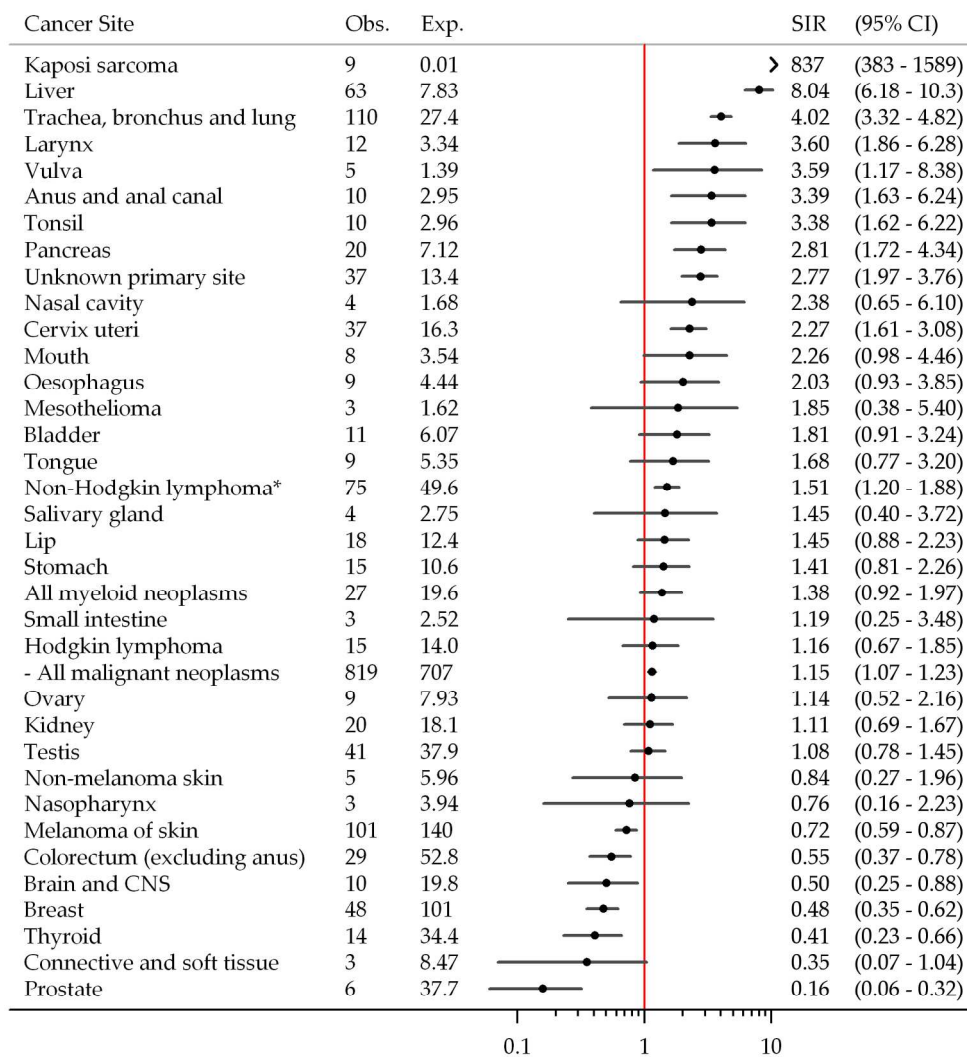

Figure 1 Risk of cancer among NSW opioid substitution therapy registrants, 1985–2007  
529x587mm (96 x 96 DPI)



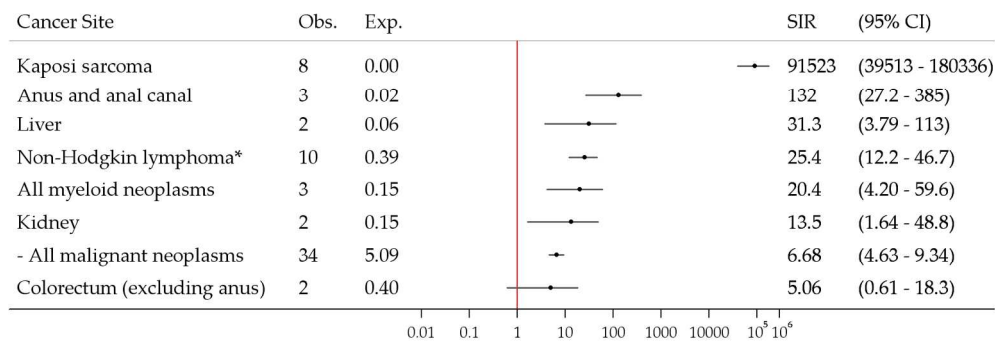

Figure 2 Risk of cancer in NSW opioid substitution therapy registrants with notified HIV infection, 1985–2007  
492x169mm (96 x 96 DPI)

peer review only



Figure 3 Risk of cancer among NSW opioid substitution therapy registrants with notified hepatitis C infection and registrants without notified hepatitis B, hepatitis C or HIV infection, 1993–2007  
872x360mm (96 x 96 DPI)
